# Supplementary material for: Genetic Diversity in Oilseed and Vegetable Mustard (Brassica juncea L.) Accessions Revealed by Nuclear and Mitochondrial Molecular Markers
Source: MDPI journal article supplement (doi:10.3390/agronomy13030919), 2023-03-20
Supplement: s1 [file s1]

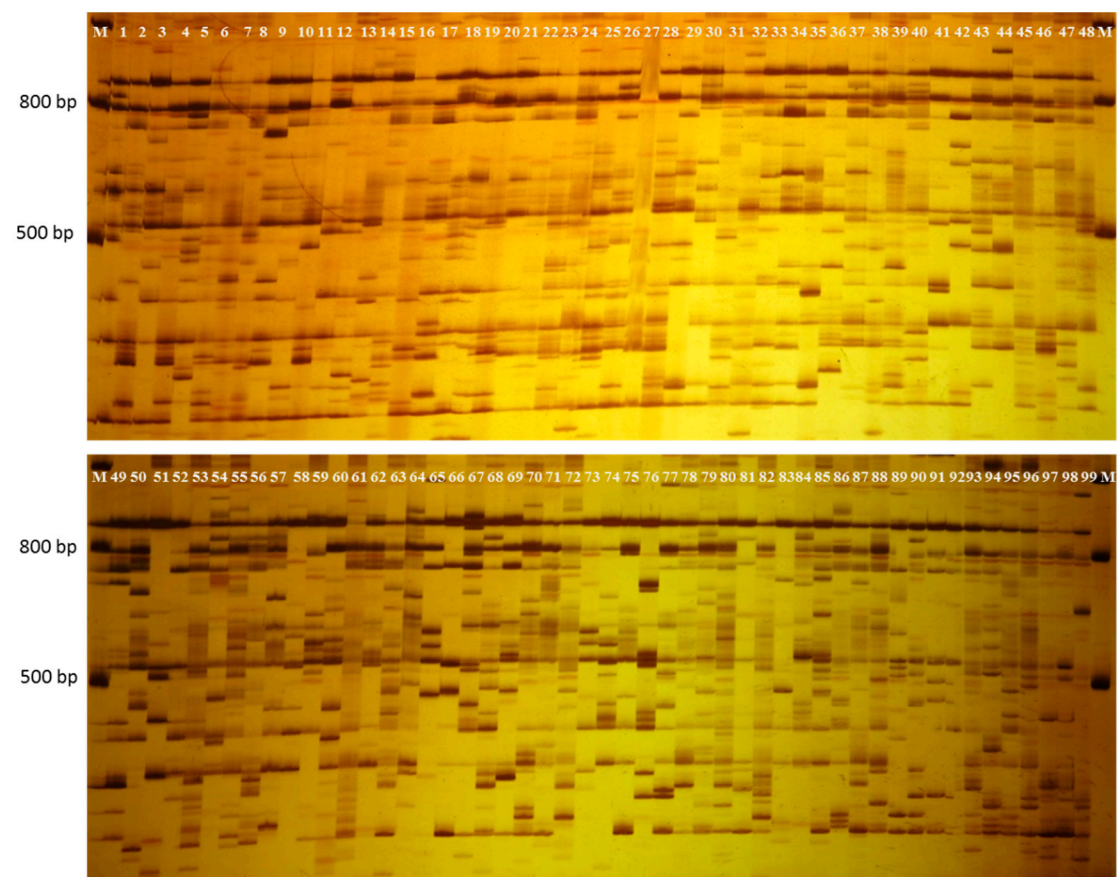

**Figure S1.** PCR amplification of the tested accessions using the SRAP primer Em10Me24. M, marker; the accession numbers are shown in Table S1.
