# Supplementary material for: Genetic Diversity in Oilseed and Vegetable Mustard (Brassica juncea L.) Accessions Revealed by Nuclear and Mitochondrial Molecular Markers
Source: MDPI journal article supplement (doi:10.3390/agronomy13030919), 2023-03-20
Supplement: s1 [file s1]

**Table S3.** Information of 18 pairs of simple sequence repeat (SSR) primers

| SSR primers | Forward//Reserve primer sequence (5'-3')          | Polymorphic fragments | Size range of amplified fragments (bp) | PIC   | NA     | NE    | H     | I     |
|-------------|---------------------------------------------------|-----------------------|----------------------------------------|-------|--------|-------|-------|-------|
| BrgMS135    | GCATCACCCCTAGTTAATCGAA // AAGAAGGGAGAAAACCTGAAACC | 8                     | 200-600                                | 0.843 | 1.8283 | 1.717 | 0.378 | 0.536 |
| BrgMS13     | CCACCCCTAAGTTTTACTCCAA // AGGTTGAGTGAGAGGGAAGAGA  | 3                     | 100-600                                | 0.559 | 1.919  | 1.850 | 0.439 | 0.616 |
| BrgM33      | GATCACGTCGCAGTATATCCA // TTGGTTCCCCATCTACCATATC   | 3                     | 300-500                                | 0.579 | 1.424  | 1.272 | 0.160 | 0.237 |
| BrgMS202    | ATCGCCTCAACACACAGTAAAA // TTAGCAAGCATTGATGAAGAGC  | 6                     | 200-500                                | 0.781 | 1.960  | 1.845 | 0.444 | 0.628 |
| BrgMS204    | TCTGTGTGCAGGAGAACTGTA // AGATCGTGAGTTCTTGGATGAC   | 6                     | 200-300                                | 0.792 | 1.879  | 1.740 | 0.395 | 0.561 |
| BrgMS217    | CATTCCGCCTAAGCTCATTAAC // CAATTTACCTGCACCTAGTCA   | 5                     | 100-200                                | 0.650 | 1.980  | 1.717 | 0.406 | 0.590 |
| BrgMS268    | TCACCATGTGTAAAAGACTCGG // TTGGCTTATCTTCTTGGGATTG  | 6                     | 300-500                                | 0.790 | 1.828  | 1.647 | 0.357 | 0.513 |
| BrgMS287    | TGGGTCTCAGTTTCCATTTTCT // TGCTTGTGAATCTTTGTGTGTG  | 6                     | 400-500                                | 0.797 | 1.758  | 1.655 | 0.346 | 0.491 |
| BrgMS318    | AACGAAAGACTCGACAGAAAGG // GTGAAGGTCAGGCGAATTTAAG  | 8                     | 100-500                                | 0.851 | 1.980  | 1.773 | 0.427 | 0.613 |
| BrgMS343    | CCCAAATATCAATCTCAAAGCC // TCGTTTCTCATCAATCTGTTGG  | 3                     | 300-500                                | 0.592 | 1.131  | 1.099 | 0.055 | 0.079 |
| BrgMS383    | TCGGGCAGATAAAGTAATCCAT // AGAAACCCCTTCACAACAATGA  | 8                     | 300-400                                | 0.850 | 1.970  | 1.831 | 0.441 | 0.624 |
| BrgMS479    | AGTTGGAACCCCTATCCATTTT // TCTTTGCTTTCTTCTCCTTTTCG | 7                     | 100-500                                | 0.828 | 1.818  | 1.717 | 0.380 | 0.536 |
| BrgMS513    | TCTCAGCCTTTAACTTCTCCCA // AACTTTGTTTCAGCTCCTGCTC  | 4                     | 300-400                                | 0.701 | 1.303  | 1.236 | 0.126 | 0.182 |

Table S3. Continued

| SSR primers | Forward//Reserve primer sequence (5'-3')         | Polymorphic fragments | Size range of amplified fragments (bp) | PIC   | NA    | NE    | H     | I     |
|-------------|--------------------------------------------------|-----------------------|----------------------------------------|-------|-------|-------|-------|-------|
| BrgMS629    | GTGCTTTCTGCGTTATTTCTCA // TTACGACCACCAACTAGCAAAA | 6                     | 300-500                                | 0.807 | 1.616 | 1.530 | 0.282 | 0.399 |
| BrgMS635    | GTGTTTCTCTTCAACGCCTTTT // CACAAAGAATCCCCACAGATTT | 5                     | 300-500                                | 0.748 | 1.869 | 1.600 | 0.310 | 0.499 |
| BrgMS801    | ACAAACCTTCTTGTCCTGTCGT // ATATCTTAGCTCTCCACGATGC | 5                     | 200-300                                | 0.693 | 1.970 | 1.779 | 0.424 | 0.608 |
| BrgMS4508   | AAAGAAGCTGCTCTTGTTGAGG // TACCCATGAATCTCCGTCTTCT | 5                     | 200-600                                | 0.760 | 1.636 | 1.570 | 0.296 | 0.417 |
| BRAS078     | ATTGGGTCTGACCTTTTCTC // CTTTCCTCATCGCTACCAC      | 7                     | 100-500                                | 0.835 | 1.859 | 1.688 | 0.375 | 0.538 |
| Total       |                                                  | 101                   |                                        |       |       |       |       |       |
| Average     |                                                  | 5.61                  |                                        | 0.747 | 1.673 | 1.626 | 0.333 | 0.496 |

PIC, Polymorphic information content; NA, Observed number of alleles; NE, Effective number of alleles; H, Nei's gene diversity; I, Shannon's information index.
