# Supplementary material for: Genetic Diversity in Oilseed and Vegetable Mustard (Brassica juncea L.) Accessions Revealed by Nuclear and Mitochondrial Molecular Markers
Source: MDPI journal article supplement (doi:10.3390/agronomy13030919), 2023-03-20
Supplement: s1 [file s1]

Archive with 13 entries (13 files):
- Appendix S1.pdf
- Figure S1.pdf
- Figure S2.pdf
- Figure S3.pdf
- Figure S4.pdf
- Figure S5.pdf
- Table S1.pdf
- Table S2.pdf
- Table S3.pdf
- Table S4.pdf
- Table S5.pdf
- Table S6.pdf
- Table S7.pdf
