# Supplementary material for: Genetic Diversity in Oilseed and Vegetable Mustard (Brassica juncea L.) Accessions Revealed by Nuclear and Mitochondrial Molecular Markers
Source: MDPI journal article supplement (doi:10.3390/agronomy13030919), 2023-03-20
Supplement: s1 [file s1 › Appendix S1.pdf]

## Sequencing results of PCR products amplified by the Indel marker and the SNP marker

### 1) Sequencing results of PCR products amplified by the Indel marker (Kang et al., 2021).

Six samples have mitochondrial type 1 (MT1) (Nos. 4, 9, 86, 89, 90, and 91), five samples have MT2 (Nos. 13, 14, 15, 16, and 81), four samples have MT3 (Nos. 3, 12, 57, and 58), and two samples have MT4 (Nos. 87, and 88). The accession numbers are shown in Table 1.

- Nos. 4, 9, 86, 89, 90, and 91 (MT1)

- No. 4 (MT1)

AGTCCGAGGACCTTTAGTACCGTACCCCCAACCAGCAGCCTTCGCGCCAAGCAAGAC  
CGCCCTTGTCCTCTCCTTTAGTCGAGTTTGTGTTACAAACCTCTCCTTTTAGTCGAGT  
AAGAAATACCTCGGGAAGTAGGGCTCCTATTGACTAAAGATTGGTTCTTCGCTTTCCT  
TTAGAATGAAAGTAGCTATGA

- No. 9 (MT1)

AGTCCGAGGACCTTTAGTACCGTACCCCCAACCAGCAGCCTTCGCGCCAAGCAAGAC  
CGCCCTTGTCCTCTCCTTTAGTCGAGTTTGTGTTACAAACCTCTCCTTTTAGTCGAGT  
AAGAAATACCTCGGGAAGTAGGGCTCCTATTGACTAAAGATTGGTTCTTCGCTTTCCT  
TTAGAATGAAAGTAGCTATGA

- No. 86 (MT1)

AGTCCGAGGACCTTTAGTACCGTACCCCCAACCAGCAGCCTTCGCGCCAAGCAAGAC  
CGCCCTTGTCCTCTCCTTTAGTCGAGTTTGTGTTACAAACCTCTCCTTTTAGTCGAGT  
AAGAAATACCTCGGGAAGTAGGGCTCCTATTGACTAAAGATTGGTTCTTCGCTTTCCT  
TTAGAATGAAAGTAGCTATGA

- No. 89 (MT1)

AGTCCGAGGACCTTTAGTACCGTACCCCCAACCAGCAGCCTTCGCGCCAAGCAAGAC  
CGCCCTTGTCCTCTCCTTTAGTCGAGTTTGTGTTACAAACCTCTCCTTTTAGTCGAGT  
AAGAAATACCTCGGGAAGTAGGGCTCCTATTGACTAAAGATTGGTTCTTCGCTTTCCT  
TTAGAATGAAAGTAGCTATGA

- No. 90 (MT1)

AGTCCGAGGACCTTTAGTACCGTACCCCCAACCAGCAGCCTTCGCGCCAAGCAAGAC  
CGCCCTTGTCCTCTCCTTTAGTCGAGTTTGTGTTACAAACCTCTCCTTTTAGTCGAGT  
AAGAAATACCTCGGGAAGTAGGGCTCCTATTGACTAAAGATTGGTTCTTCGCTTTCCT  
TTAGAATGAAAGTAGCTATGA

- No. 91 (MT1)

AGTCCGAGGACCTTTAGTACCGTACCCCCAACCAGCAGCCTTCGCGCCAAGCAAGAC  
CGCCCTTGTCCTCTCCTTTAGTCGAGTTTGTGTTACAAACCTCTCCTTTTAGTCGAGT  
AAGAAATACCTCGGGAAGTAGGGCTCCTATTGACTAAAGATTGGTTCTTCGCTTTCCT  
TTAGAATGAAAGTAGCTATGA

- Nos. 13, 14, 15, 16, and 81 (MT2). The colored sequences under the line represent

the 31bp insertion.

- No. 13 (MT2)

AGTCCGAGGACCTTTAGTACCGTACCCCCAACCAGCAGCCTTCGCGCCAAGCAAGAC  
CGCCCTTGTCCTCTCCTTTCAGTCGAGTTTGTGTTTACAACCTCTCCTTTCAGTCGAGT  
TTGTGTTTACAACCTCTCCTTTTAGTCGAGTAAGAAATACCTCGGGAAGTAGGGCTCC  
TATTGACTAAAGATTGGTTCTTCGCTTTCCTTTAGAATGAAAGTAGCTATGA

- No. 14 (MT2)

AGTCCGAGGACCTTTAGTACCGTACCCCCAACCAGCAGCCTTCGCGCCAAGCAAGAC  
CGCCCTTGTCCTCTCCTTTCAGTCGAGTTTGTGTTTACAACCTCTCCTTTCAGTCGAGT  
TTGTGTTTACAACCTCTCCTTTTAGTCGAGTAAGAAATACCTCGGGAAGTAGGGCTCC  
TATTGACTAAAGATTGGTTCTTCGCTTTCCTTTAGAATGAAAGTAGCTATGA

- No. 15 (MT2)

AGTCCGAGGACCTTTAGTACCGTACCCCCAACCAGCAGCCTTCGCGCCAAGCAAGAC  
CGCCCTTGTCCTCTCCTTTCAGTCGAGTTTGTGTTTACAACCTCTCCTTTCAGTCGAGT  
TTGTGTTTACAACCTCTCCTTTTAGTCGAGTAAGAAATACCTCGGGAAGTAGGGCTCC  
TATTGACTAAAGATTGGTTCTTCGCTTTCCTTTAGAATGAAAGTAGCTATGA

- No. 16 (MT2)

AGTCCGAGGACCTTTAGTACCGTACCCCCAACCAGCAGCCTTCGCGCCAAGCAAGAC  
CGCCCTTGTCCTCTCCTTTCAGTCGAGTTTGTGTTTACAACCTCTCCTTTCAGTCGAGT  
TTGTGTTTACAACCTCTCCTTTTAGTCGAGTAAGAAATACCTCGGGAAGTAGGGCTCC  
TATTGACTAAAGATTGGTTCTTCGCTTTCCTTTAGAATGAAAGTAGCTATGA

- No. 81 (MT2)

AGTCCGAGGACCTTTAGTACCGTACCCCCAACCAGCAGCCTTCGCGCCAAGCAAGAC  
CGCCCTTGTCCTCTCCTTTCAGTCGAGTTTGTGTTTACAACCTCTCCTTTCAGTCGAGT  
TTGTGTTTACAACCTCTCCTTTTAGTCGAGTAAGAAATACCTCGGGAAGTAGGGCTCC  
TATTGACTAAAGATTGGTTCTTCGCTTTCCTTTAGAATGAAAGTAGCTATGA

- No. 3, 12, 57, and 58 (MT3)

- No. 3 (MT3)

AGTCCGAGGACCTTTAGTACCGTACCCCCAACCAGCAGCCTTCGCGCCAAGCAAGAC  
CGCCCTTGTCCTCTCCTTTCAGTCGAGTTTGTGTTTACAACCTCTCCTTTTAGTCGAGT  
AAGAAATACCTCGGGAAGTAGGGCTCCTATTGACTAAAGATTGGTTCTTCGCTTTCCT  
TTAGAATGAAAGTAGCTATGA

- No. 12 (MT3)

AGTCCGAGGACCTTTAGTACCGTACCCCCAACCAGCAGCCTTCGCGCCAAGCAAGAC  
CGCCCTTGTCCTCTCCTTTCAGTCGAGTTTGTGTTTACAACCTCTCCTTTTAGTCGAGT  
AAGAAATACCTCGGGAAGTAGGGCTCCTATTGACTAAAGATTGGTTCTTCGCTTTCCT  
TTAGAATGAAAGTAGCTATGA

- No. 57 (MT3)

AGTCCGAGGACCTTTAGTACCGTACCCCCAACCAGCAGCCTTCGCGCCAAGCAAGAC  
CGCCCTTGTCCTCTCCTTTCAGTCGAGTTTGTGTTTACAACCTCTCCTTTTAGTCGAGT  
AAGAAATACCTCGGGAAGTAGGGCTCCTATTGACTAAAGATTGGTTCTTCGCTTTCCT  
TTAGAATGAAAGTAGCTATGA

- No. 58 (MT3)

AGTCCGAGGACCTTTAGTACCGTACCCCCAACCAGCAGCCTTCGCGCCAAGCAAGAC

CGCCCTTGTCCTCTCCTTTTCAGTCGAGTTTGTGTTTACAACCTCTCCTTTTAGTCGAGT  
AAGAAATACCTCGGGAAGTAGGGCTCCTATTGACTAAAGATTGGTTCTTCGCTTTCCT  
TTAGAATGAAAGTAGCTATGA

- No. 87, and 88 (MT4). The colored sequences under the line represent the 93bp insertion.

- No. 87 (MT4)

AGTCCGAGGACCTTTAGTACCGTACCCCCAACCAGCAGCCTTCGCGCCAAGCAAGAC  
CGCCCTTGTCCTCTCCTTTTCAGTCGAGTTTGTGTTTACAACCTCTCCTTT CAGTCGAG  
TTTGTGTTTACAACCTCTCCTTTTCAGTCGAGTTTGTGTTTACAACCTCTCCTTTTCAG  
TCGAGTTTGTGTTTACAACCTCTCCTTT TAGTCGAGTAAGAAATACCTCGGGAAGTA  
GGGCTCCTATTGACTAAAGATTGGTTCTTCGCTTTCCTTTAGAATGAAAGTAGCTATG  
A

- No. 88 (MT4)

AGTCCGAGGACCTTTAGTACCGTACCCCCAACCAGCAGCCTTCGCGCCAAGCAAGAC  
CGCCCTTGTCCTCTCCTTTTCAGTCGAGTTTGTGTTTACAACCTCTCCTTT CAGTCGAG  
TTTGTGTTTACAACCTCTCCTTTTCAGTCGAGTTTGTGTTTACAACCTCTCCTTTTCAG  
TCGAGTTTGTGTTTACAACCTCTCCTTT TAGTCGAGTAAGAAATACCTCGGGAAGTA  
GGGCTCCTATTGACTAAAGATTGGTTCTTCGCTTTCCTTTAGAATGAAAGTAGCTATG  
A

## 2) Sequencing results of PCR products amplified by the SNP marker (Hatono et al., 2017).

PCR products of 74 samples amplified by the SNP marker were sequenced and analyzed. The results indicated that the MT1 (32 samples) have the C base, the MT3 (42 samples) have the A base at that locus in the mitochondrial genome.

- 32 samples with (MT1 having C-79579, **the colored letter**), including Nos. 4, 9, 24, 25, 27, 28, 29, 36, 38, 39, 40, 41, 48, 49, 51, 52, 53, 54, 73, 74, 75, 76, 86, 89, 90, 91, 94, 95, 96, 97, 98, 99.

- No. 4

TCTTGCTGCGACAAGCAGCTTAGGAATGAATCTAAGAAATTTAGGTCTCTGCCCGCTT  
GAAAGATTCTTCTTTCCT **CTTC**GGTGAAAGAGGGCAAAGGTGTGTAGGAGAAAGAAT  
TCTAAAAACGTCGACGCTTAATTCGCCCCGAGGAATGCTTTCAAAAGTCAAAGAAA  
GGCTCAAATATCAATATATATATTTTAGGATATTTTAGGGCCCTAGAACGCAAAAAA  
AAGTGGGTGAACAAGAGTTGTCACGATAGGAAAGAGAAATGACTATAAGGAAC

- No. 9

TCTTGCTGCGACAAGCAGCTTAGGAATGAATCTAAGAAATTTAGGTCTCTGCCCGCTT  
GAAAGATTCTTCTTTCCT **CTTC**GGTGAAAGAGGGCAAAGGTGTGTAGGAGAAAGAAT  
TCTAAAAACGTCGACGCTTAATTCGCCCCGAGGAATGCTTTCAAAAGTCAAAGAAA  
GGCTCAAATATCAATATATATATTTTAGGATATTTTAGGGCCCTAGAACGCAAAAAA  
AAGTGGGTGAACAAGAGTTGTCACGATAGGAAAGAGAAATGACTATAAGGAAC

- No. 24

TCTTGCTGCGACAAGCAAGCTTAGGAATGAATCTAAGAAATTTAGGTCTCTGCCCGCT  
TGAAAGATTCTTCTTTCCT **CTTC**GGTGAAAGAGGGCAAAGGTGTGTAGGAGAAAGAA

TTCTAAAAACGTCGACGCTTAATTCGCCCCCGAGGAATGCTTTCAAAAGTCAAAGAA  
AGGCTCAAATATCAATATATATATTTTAGGATATTTTAGGGCCCTAGAACGCAAAAA  
AAAGTGGGTGAACAAGAGTTGTCACGATAGGAAAGAGAAATGACTATAAGGAAC

● No. 25

TCTTGCTGCGACAAGCAAGCTTAGGAATGAATCTAAGAAATTTAGGTCTCTGCCCCGCT  
TGAAAGATTCTTCTTTCCTTTTCGGTGAAAGAGGGCAAAGGTGTGTAGGAGAAAGAA  
TTCTAAAAACGTCGACGCTTAATTCGCCCCCGAGGAATGCTTTCAAAAGTCAAAGAA  
AGGCTCAAATATCAATATATATATTTTAGGATATTTTAGGGCCCTAGAACGCAAAAA  
AAAGTGGGTGAACAAGAGTTGTCACGATAGGAAAGAGAAATGACTATAAGGAAC

● No. 27

TCTTGCTGCGACAAGCAAGCTTAGGAATGAATCTAAGAAATTTAGGTCTCTGCCCCGCT  
TGAAAGATTCTTCTTTCCTTTTCGGTGAAAGAGGGCAAAGGTGTGTAGGAGAAAGAA  
TTCTAAAAACGTCGACGCTTAATTCGCCCCCGAGGAATGCTTTCAAAAGTCAAAGAA  
AGGCTCAAATATCAATATATATATTTTAGGATATTTTAGGGCCCTAGAACGCAAAAA  
AAAGTGGGTGAACAAGAGTTGTCACGATAGGAAAGAGAAATGACTATAAGGAAC

● No. 28

TCTTGCTGCGACAAGCAGCTTAGGAATGAATCTAAGAAATTTAGGTCTCTGCCCCGCTT  
GAAAGATTCTTCTTTCCTTTTCGGTGAAAGAGGGCAAAGGTGTGTAGGAGAAAGAAT  
TCTAAAAACGTCGACGCTTAATTCGCCCCCGAGGAATGCTTTCAAAAGTCAAAGAAA  
GGCTCAAATATCAATATATATATTTTAGGATATTTTAGGGCCCTAGAACGCAAAAA  
AAGTGGGTGAACAAGAGTTGTCACGATAGGAAAGAGAAATGACTATAAGGAAC

● No. 29

TCTTGCTGCGACAAGCAGCTTAGGAATGAATCTAAGAAATTTAGGTCTCTGCCCCGCTT  
GAAAGATTCTTCTTTCCTTTTCGGTGAAAGAGGGCAAAGGTGTGTAGGAGAAAGAAT  
TCTAAAAACGTCGACGCTTAATTCGCCCCCGAGGAATGCTTTCAAAAGTCAAAGAAA  
GGCTCAAATATCAATATATATATTTTAGGATATTTTAGGGCCCTAGAACGCAAAAA  
AAGTGGGTGAACAAGAGTTGTCACGATAGGAAAGAGAAATGACTATAAGGAAC

● No. 36

TCTTGCTGCGACAAGCAAGCTTAGGAATGAATCTAAGAAATTTAGGTCTCTGCCCCGCT  
TGAAAGATTCTTCTTTCCTTTTCGGTGAAAGAGGGCAAAGGTGTGTAGGAGAAAGAA  
TTCTAAAAACGTCGACGCTTAATTCGCCCCCGAGGAATGCTTTCAAAAGTCAAAGAA  
AGGCTCAAATATCAATATATATATTTTAGGATATTTTAGGGCCCTAGAACGCAAAAA  
AAAGTGGGTGAACAAGAGTTGTCACGATAGGAAAGAGAAATGACTATAAGGAAC

● No. 38

TCTTGCTGCGACAAGCAGCTTAGGAATGAATCTAAGAAATTTAGGTCTCTGCCCCGCTT  
GAAAGATTCTTCTTTCCTTTTCGGTGAAAGAGGGCAAAGGTGTGTAGGAGAAAGAAT  
TCTAAAAACGTCGACGCTTAATTCGCCCCCGAGGAATGCTTTCAAAAGTCAAAGAAA  
GGCTCAAATATCAATATATATATTTTAGGATATTTTAGGGCCCTAGAACGCAAAAA  
AAGTGGGTGAACAAGAGTTGTCACGATAGGAAAGAGAAATGACTATAAGGAAC

● No. 39

TCTTGCTGCGACAAGCAGCTTAGGAATGAATCTAAGAAATTTAGGTCTCTGCCCCGCTT  
GAAAGATTCTTCTTTCCTTTTCGGTGAAAGAGGGCAAAGGTGTGTAGGAGAAAGAAT  
TCTAAAAACGTCGACGCTTAATTCGCCCCCGAGGAATGCTTTCAAAAGTCAAAGAAA  
GGCTCAAATATCAATATATATATTTTAGGATATTTTAGGGCCCTAGAACGCAAAAA

AAGTGGGTGAACAAGAGTTGTCACGATAGGAAAGAGAAATGACTATAAGGAAC

● No. 40

TCTGCTGCGACAAGCAGCTTAGGAATGAATCTAAGAAATTTAGGTCTCTGCCCCGCTT  
AAAGATTCTTCTTTCCTCTTCGGTGAAAGAGGGCAAAGGTGTGTAGGAGAAAGAATT  
CTAAAAACGTCGACGCTTAATTCGCCCCCGAGGAATGCTTTCAAAAGTCAAAGAAAG  
GCTCAAATATCAATATATATATTTTAGGATATTTTAGGGCCCTAGAACGCAAAAAA  
AGTGGGTGAACAAGAGTTGTCACGATAGGAAAGAGAAATGACTATAAGGAAC

● No. 41

TCTTGCTGCGACAAGCAGCTTAGGAATGAATCTAAGAAATTTAGGTCTCTGCCCCGCTT  
GAAAGATTCTTCTTTCCTCTTCGGTGAAAGAGGGCAAAGGTGTGTAGGAGAAAGAAT  
TCTAAAAACGTCGACGCTTAATTCGCCCCCGAGGAATGCTTTCAAAAGTCAAAGAAA  
GGCTCAAATATCAATATATATATTTTAGGATATTTTAGGGCCCTAGAACGCAAAAAA  
AAGTGGGTGAACAAGAGTTGTCACGATAGGAAAGAGAAATGACTATAAGGAAC

● No. 48

TCTTGCTGCGACAAGCAGCTTAGGAATGAATCTAAGAAATTTAGGTCTCTGCCCCGCTT  
GAAAGATTCTTCTTTCCTCTTCGGTGAAAGAGGGCAAAGGTGTGTAGGAGAAAGAAT  
TCTAAAAACGTCGACGCTTAATTCGCCCCCGAGGAATGCTTTCAAAAGTCAAAGAAA  
GGCTCAAATATCAATATATATATTTTAGGATATTTTAGGGCCCTAGAACGCAAAAAA  
AAGTGGGTGAACAAGAGTTGTCACGATAGGAAAGAGAAATGACTATAAGGAAC

● No. 49

TCTTGCTGCGACAAGCAGCTTAGGAATGAATCTAAGAAATTTAGGTCTCTGCCCCGCTT  
GAAAGATTCTTCTTTCCTCTTCGGTGAAAGAGGGCAAAGGTGTGTAGGAGAAAGAAT  
TCTAAAAACGTCGACGCTTAATTCGCCCCCGAGGAATGCTTTCAAAAGTCAAAGAAA  
GGCTCAAATATCAATATATATATTTTAGGATATTTTAGGGCCCTAGAACGCAAAAAA  
AAGTGGGTGAACAAGAGTTGTCACGATAGGAAAGAGAAATGACTATAAGGAAC

● No. 51

TCTTGCTGCGACAAGCAAGCTTAGGAATGAATCTAAGAAATTTAGGTCTCTGCCCCGCTT  
TGAAAGATTCTTCTTTCCTCTTCGGTGAAAGAGGGCAAAGGTGTGTAGGAGAAAGAA  
TTCTAAAAACGTCGACGCTTAATTCGCCCCCGAGGAATGCTTTCAAAAGTCAAAGAA  
AGGCTCAAATATCAATATATATATTTTAGGATATTTTAGGGCCCTAGAACGCAAAAAA  
AAAGTGGGTGAACAAGAGTTGTCACGATAGGAAAGAGAAATGACTATAAGGAAC

● No. 52

TCTTGCTGCGACAAGCAGCTTAGGAATGAATCTAAGAAATTTAGGTCTCTGCCCCGCTT  
GAAAGATTCTTCTTTCCTCTTCGGTGAAAGAGGGCAAAGGTGTGTAGGAGAAAGAAT  
TCTAAAAACGTCGACGCTTAATTCGCCCCCGAGGAATGCTTTCAAAAGTCAAAGAAA  
GGCTCAAATATCAATATATATATTTTAGGATATTTTAGGGCCCTAGAACGCAAAAAA  
AAGTGGGTGAACAAGAGTTGTCACGATAGGAAAGAGAAATGACTATAAGGAAC

● No. 53

TCTTGCTGCGACAAGCAGCTTAGGAATGAATCTAAGAAATTTAGGTCTCTGCCCCGCTT  
GAAAGATTCTTCTTTCCTCTTCGGTGAAAGAGGGCAAAGGTGTGTAGGAGAAAGAAT  
TCTAAAAACGTCGACGCTTAATTCGCCCCCGAGGAATGCTTTCAAAAGTCAAAGAAA  
GGCTCAAATATCAATATATATATTTTAGGATATTTTAGGGCCCTAGAACGCAAAAAA  
AAGTGGGTGAACAAGAGTTGTCACGATAGGAAAGAGAAATGACTATAAGGAAC

● No. 54

TCTTGCTGCGACAAGCAGCTTAGGAATGAATCTAAGAAATTTAGGTCTCTGCCCCGCTT  
GAAAGATTCTTCTTTCCTCTTCGGTGAAAGAGGGCAAAGGTGTGTAGGAGAAAGAAT  
TCTAAAAACGTCGACGCTTAATTCGCCCCCGAGGAATGCTTTCAAAAGTCAAAGAAA  
GGCTCAAATATCAATATATATATTTTAGGATATTTTAGGGCCCTAGAACGCAAAAAA  
AAGTGGGTGAACAAGAGTTGTCACGATAGGAAAGAGAAATGACTATAAGGAAC

● No. 73

TCTTGCTGCGACAAGCAAGCTTAGGAATGAATCTAAGAAATTTAGGTCTCTGCCCCGCT  
TGAAAGATTCTTCTTTCCTCTTCGGTGAAAGAGGGCAAAGGTGTGTAGGAGAAAGAA  
TTCTAAAAACGTCGACGCTTAATTCGCCCCCGAGGAATGCTTTCAAAAGTCAAAGAA  
AGGCTCAAATATCAATATATATATTTTAGGATATTTTAGGGCCCTAGAACGCAAAAA  
AAAGTGGGTGAACAAGAGTTGTCACGATAGGAAAGAGAAATGACTATAAGGAAC

● No. 74

TCTTGCTGCGACAAGCAAGCTTAGGAATGAATCTAAGAAATTTAGGTCTCTGCCCCGCT  
TGAAAGATTCTTCTTTCCTCTTCGGTGAAAGAGGGCAAAGGTGTGTAGGAGAAAGAA  
TTCTAAAAACGTCGACGCTTAATTCGCCCCCGAGGAATGCTTTCAAAAGTCAAAGAA  
AGGCTCAAATATCAATATATATATTTTAGGATATTTTAGGGCCCTAGAACGCAAAAA  
AAAGTGGGTGAACAAGAGTTGTCACGATAGGAAAGAGAAATGACTATAAGGAAC

● No. 75

TCTTGCTGCGACAAGCAGCTTAGGAATGAATCTAAGAAATTTAGGTCTCTGCCCCGCTT  
GAAAGATTCTTCTTTCCTCTTCGGTGAAAGAGGGCAAAGGTGTGTAGGAGAAAGAAT  
TCTAAAAACGTCGACGCTTAATTCGCCCCCGAGGAATGCTTTCAAAAGTCAAAGAAA  
GGCTCAAATATCAATATATATATTTTAGGATATTTTAGGGCCCTAGAACGCAAAAAA  
AAGTGGGTGAACAAGAGTTGTCACGATAGGAAAGAGAAATGACTATAAGGAAC

● No. 76

TCTTGCTGCGACAAGCAAGCTTAGGAATGAATCTAAGAAATTTAGGTCTCTGCCCCGCT  
TGAAAGATTCTTCTTTCCTCTTCGGTGAAAGAGGGCAAAGGTGTGTAGGAGAAAGAA  
TTCTAAAAACGTCGACGCTTAATTCGCCCCCGAGGAATGCTTTCAAAAGTCAAAGAA  
AGGCTCAAATATCAATATATATATTTTAGGATATTTTAGGGCCCTAGAACGCAAAAA  
AAAGTGGGTGAACAAGAGTTGTCACGATAGGAAAGAGAAATGACTATAAGGAAC

● No. 86

TCTTGCTGCGACAAGCAAGCTTAGGAATGAATCTAAGAAATTTAGGTCTCTGCCCCGCT  
TGAAAGATTCTTCTTTCCTCTTCGGTGAAAGAGGGCAAAGGTGTGTAGGAGAAAGAA  
TTCTAAAAACGTCGACGCTTAATTCGCCCCCGAGGAATGCTTTCAAAAGTCAAAGAA  
AGGCTCAAATATCAATATATATATTTTAGGATATTTTAGGGCCCTAGAACGCAAAAA  
AAAGTGGGTGAACAAGAGTTGTCACGATAGGAAAGAGAAATGACTATAAGGAAC

● No. 89

TCTTGCTGCGACAAGCAGCTTAGGAATGAATCTAAGAAATTTAGGTCTCTGCCCCGCTT  
GAAAGATTCTTCTTTCCTCTTCGGTGAAAGAGGGCAAAGGTGTGTAGGAGAAAGAAT  
TCTAAAAACGTCGACGCTTAATTCGCCCCCGAGGAATGCTTTCAAAAGTCAAAGAAA  
GGCTCAAATATCAATATATATATTTTAGGATATTTTAGGGCCCTAGAACGCAAAAAA  
AAGTGGGTGAACAAGAGTTGTCACGATAGGAAAGAGAAATGACTATAAGGAAC

● No. 90

TCTTGCTGCGACAAGCAAGCTTAGGAATGAATCTAAGAAATTTAGGTCTCTGCCCCGCT  
TGAAAGATTCTTCTTTCCTCTTCGGTGAAAGAGGGCAAAGGTGTGTAGGAGAAAGAA

TTCTAAAAACGTCGACGCTTAATTCGCCCCCGAGGAATGCTTTCAAAAGTCAAAGAA  
AGGCTCAAATATCAATATATATATTTTAGGATATTTTAGGGCCCTAGAACGCAAAAA  
AAAGTGGGTGAACAAGAGTTGTCACGATAGGAAAGAGAAATGACTATAAGGAAC

● No. 91

TCTTGCTGCGACAAGCAGCTTAGGAATGAATCTAAGAAATTTAGGTCTCTGCCCCGCTT  
GAAAGATTCTTCTTTCCTTTTCGGTGAAAGAGGGCAAAGGTGTGTAGGAGAAAGAAT  
TCTAAAAACGTCGACGCTTAATTCGCCCCCGAGGAATGCTTTCAAAAGTCAAAGAAA  
GGCTCAAATATCAATATATATATTTTAGGATATTTTAGGGCCCTAGAACGCAAAAA  
AAGTGGGTGAACAAGAGTTGTCACGATAGGAAAGAGAAATGACTATAAGGAAC

● No. 94

TCTTGCTGCGACAAGCAGCTTAGGAATGAATCTAAGAAATTTAGGTCTCTGCCCCGCTT  
GAAAGATTCTTCTTTCCTTTTCGGTGAAAGAGGGCAAAGGTGTGTAGGAGAAAGAAT  
TCTAAAAACGTCGACGCTTAATTCGCCCCCGAGGAACGCTTTCAAAAGTCAAAGAAA  
GGCTCAAATATCAATATATATATTTTAGGATATTTTAGGGCCCTAGAACGCAAAAA  
AAGTGGGTGAACAAGAGTTGTCACGATAGGAAAGAGAAATGACTATAAGGAAC

● No. 95

TCTTGCTGCGACAAGCAGCTTAGGAATGAATCTAAGAAATTTAGGTCTCTGCCCCGCTT  
GAAAGATTCTTCTTTCCTTTTCGGTGAAAGAGGGCAAAGGTGTGTAGGAGAAAGAAT  
TCTAAAAACGTCGACGCTTAATTCGCCCCCGAGGAACGCTTTCAAAAGTCAAAGAAA  
GGCTCAAATATCAATATATATATTTTAGGATATTTTAGGGCCCTAGAACGCAAAAA  
AAGTGGGTGAACAAGAGTTGTCACGATAGGAAAGAGAAATGACTATAAGGAAC

● No. 96

TCTTGCTGCGACAAGCAGCTTAGGAATGAATCTAAGAAATTTAGGTCTCTGCCCCGCTT  
GAAAGATTCTTCTTTCCTTTTCGGTGAAAGAGGGCAAAGGTGTGTAGGAGAAAGAAT  
TCTAAAAACGTCGACGCTTAATTCGCCCCCGAGGAACGCTTTCAAAAGTCAAAGAAA  
GGCTCAAATATCAATATATATATTTTAGGATATTTTAGGGCCCTAGAACGCAAAAA  
AAGTGGGTGAACAAGAGTTGTCACGATAGGAAAGAGAAATGACTATAAGGAAC

● No. 97

TCTTGCTGCGACAAGCAGCTTAGGAATGAATCTAAGAAATTTAGGTCTCTGCCCCGCTT  
GAAAGATTCTTCTTTCCTTTTCGGTGAAAGAGGGCAAAGGTGTGTAGGAGAAAGAAT  
TCTAAAAACGTCGACGCTTAATTCGCCCCCGAGGAATGCTTTCAAAAGTCAAAGAAA  
GGCTCAAATATCAATATATATATTTTAGGATATTTTAGGGCCCTAGAACGCAAAAA  
AAGTGGGTGAACAAGAGTTGTCACGATAGGAAAGAGAAATGACTATAAGGAAC

● No. 98

TCTTGCTGCGACAAGCAGCTTAGGAATGAATCTAAGAAATTTAGGTCTCTGCCCCGCTT  
GAAAGATTCTTCTTTCCTTTTCGGTGAAAGAGGGCAAAGGTGTGTAGGAGAAAGAAT  
TCTAAAAACGTCGACGCTTAATTCGCCCCCGAGGAATGCTTTCAAAAGTCAAAGAAA  
GGCTCAAATATCAATATATATATTTTAGGATATTTTAGGGCCCTAGAACGCAAAAA  
AAGTGGGTGAACAAGAGTTGTCACGATAGGAAAGAGAAATGACTATAAGGAAC

● No. 99

TCTTGCTGCGACAAGCAAGCTTAGGAATGAATCTAAGAAATTTAGGTCTCTGCCCCGCT  
TGAAAGATTCTTCTTTCCTTTTCGGTGAAAGAGGGCAAAGGTGTGTAGGAGAAAGAA  
TTCTAAAAACGTCGACGCTTAATTCGCCCCCGAGGAACGCTTTCAAAAGTCAAAGAA  
AGGCTCAAATATATATATATTTGAGGATATTTTAGGGCCCTAGAACGCAAAAAAAG

TGGGTGAACAAGAGTTGTCACGATAGGAAAGAGAAATGACTATAAGGAAC

- 42 samples with (MT3 having A-79579, **the colored letter**), including Nos. 1, 3, 5, 6, 12, 18, 19, 20, 31, 37, 42, 43, 44, 45, 46, 50, 55, 56, 57, 58, 59, 60, 61, 62, 63, 64, 65, 66, 67, 68, 69, 70, 71, 72, 77, 78, 79, 80, 82, 83, 84, 85.

- No. 1

TCTTGCTGCGACAAGCAAGCTTAGGAATGAATCTAAGAAATTTAGGTCTCTGCCCCGCT  
TGAAAGATTCTTCTTTCCT**A**TTCCGGTGAAAGAGGGCAAAGGTGTGTAGGAGAAAGAA  
TTCTAAAAACGTCGACGCTTAATTCGCCCCCGAGGAATGCTTTCAAAAGTCAAAGAA  
AGGCTCAAATATCAATATATATATTTTAGGATATTTTAGGGCCCTAGAACGCAAAAA  
AAAGTGGGTGAACAAGAGTTGTCACGATAGGAAAGAGAAATGACTATAAGGAAC

- No. 3

TCTTGCTGCGACAAGCAGCTTAGGATGAATCTAAGAAATTTAGGTCTCTGCCCCGCTTG  
AAAGATTCTTCTTTCCT**A**TTCCGGTGAAAGAGGGCAAAGGTGTGTAGGAGAAAGAATT  
CTAAAAACGTCGACGCTTAATTCGCCCCCGAGGAATGCTTTCAAAAGTCAAAGAAAG  
GCTCAAATATCAATATATATATTTTAGGATATTTTAGGGCCCTAGAACGCAAAAAAA  
AGTGGGTGAACAAGAGTTGTCACGATAGGAAAGAGAAATGACTATAAGGAAC

- No. 5

TCTTGCTGCGACAAGCAAGCTTAGGAATGAATCTAAGAAATTTAGGTCTCTGCCCCGCT  
TGAAAGATTCTTCTTTCCT**A**TTCCGGTGAAAGAGGGCAAAGGTGTGTAGGAGAAAGAA  
TTCTAAAAACGTCGACGCTTAATTCGCCCCCGAGGAATGCTTTCAAAAGTCAAAGAA  
AGGCTCAAATATCAATATATATATTTTAGGATATTTTAGGGCCCTAGAACGCAAAAA  
AAAGTGGGTGAACAAGAGTTGTCACGATAGGAAAGAGAAATGACTATAAGGAAC

- No. 6

TCTTGCTGCGACAAGCAAGCTTAGGAATGAATCTAAGAAATTTAGGTCTCTGCCCCGCT  
TGAAAGATTCTTCTTTCCT**A**TTCCGGTGAAAGAGGGCAAAGGTGTGTAGGAGAAAGAA  
TTCTAAAAACGTCGACGCTTAATTCGCCCCCGAGGAATGCTTTCAAAAGTCAAAGAA  
AGGCTCAAATATCAATATATATATTTTAGGATATTTTAGGGCCCTAGAACGCAAAAA  
AAAGTGGGTGAACAAGAGTTGTCACGATAGGAAAGAGAAATGACTATAAGGAAC

- No. 12

TCTTGCTGCGACAAGCAAGCTTAGGAATGAATCTAAGAAATTTAGGTCTCTGCCCCGCT  
TGAAAGATTCTTCTTTCCT**A**TTCCGGTGAAAGAGGGCAAAGGTGTGTAGGAGAAAGAA  
TTCTAAAAACGTCGACGCTTAATTCGCCCCCGAGGAATGCTTTCAAAAGTCAAAGAA  
AGGCTCAAATATCAATATATATATTTTAGGATATTTTAGGGCCCTAGAACGCAAAAA  
AAAGTGGGTGAACAAGAAGTTTGGTCACGATAAGGGAAAGAAGGAAATGACCTTA

- No. 18

TCTTGCTGCGACAAGCAAGCTTAGGAATGAATCTAAGAAATTTAGGTCTCTGCCCCGCT  
TGAAAGATTCTTCTTTCCT**A**TTCCGGTGAAAGAGGGCAAAGGTGTGTAGGAGAAAGAA  
TTCTAAAAACGTCGACGCTTAATTCGCCCCCGAGGAATGCTTTCAAAAGTCAAAGAA  
AGGCTCAAATATCAATATATATATTTTAGGATATTTTAGGGCCCTAGAACGCAAAAA  
AAAGTGGGTGAACAAGAGTTGTCACCGGATAGGAAAAGAAGAAATGGGGACTATA

- No. 19

TCTTGCTGCGACAAGCAAGCTTAGGAATGAATCTAAGAAATTTAGGTCTCTGCCCCGCT  
TGAAAGATTCTTCTTTCCT**A**TTCCGGTGAAAGAGGGCAAAGGTGTGTAGGAGAAAGAA  
TTCTAAAAACGTCGACGCTTAATTCGCCCCCGAGGAATGCTTTCAAAAGTCAAAGAA

AGGCTCAAATATCAATATATATATTTTAGGATATTTTAGGGCCCTAGAACGCAAAAA  
AAAGTGGGTGAACAAGAGTTGTCACGATAGGAAAGAGAAATGACTATAAGGAAC

● No. 20

TCTTGCTGCGACAAGCAGCTTAGGAATGAATCTAAGAAATTTAGGTCTCTGCCCCGCTT  
GAAAGATTCTTCTTTCCTATTTCGGTGAAAGAGGGCAAAGGTGTGTAGGAGAAAGAAT  
TCTAAAAACGTCGACGCTTAATTCGCCCCCGAGGAATGCTTTCAAAAGTCAAAGAAA  
GGCTCAAATATCAATATATATATTTTAGGATATTTTAGGGCCCTAGAACGCAAAAA  
AAGTGGGTGAACAAGAGTTGTCACGATAGGAAAGAGAAATGACTATAAGGAAC

● No. 31

TCTTGCTGCGACAAGCAAGCTTAGGAATGAATCTAAGAAATTTAGGTCTCTGCCCCGCT  
TGAAAGATTCTTCTTTCCTATTTCGGTGAAAGAGGGCAAAGGTGTGTAGGAGAAAGAA  
TTCTAAAAACGTCGACGCTTAATTCGCCCCCGAGGAATGCTTTCAAAAGTCAAAGAA  
AGGCTCAAATATCAATATATATATTTTAGGATATTTTAGGGCCCTAGAACGCAAAAA  
AAAGTGGGTGAACAAGAGTTGTCACGATAGGAAAGAGAAATGACTATAAGGAAC

● No. 37

TCTTGCTGCGACAAGCAGCTTAGGAATGAATCTAAGAAATTTAGGTCTCTGCCCCGCTT  
GAAAGATTCTTCTTTCCTATTTCGGTGAAAGAGGGCAAAGGTGTGTAGGAGAAAGAAT  
TCTAAAAACGTCGACGCTTAATTCGCCCCCGAGGAATGCTTTCAAAAGTCAAAGAAA  
GGCTCAAATATCAATATATATATTTTAGGATATTTTAGGGCCCTAGAACGCAAAAA  
AAGTGGGTGAACAAGAGTTGTCACGATAGGAAAGAGAAATGACTATAAGGAAC

● No. 42

TCTTGCTGCGACAAGCAGCTTAGGAATGAATCTAAGAAATTTAGGTCTCTGCCCCGCTT  
GAAAGATTCTTCTTTCCTATTTCGGTGAAAGAGGGCAAAGGTGTGTAGGAGAAAGAAT  
TCTAAAAACGTCGACGCTTAATTCGCCCCCGAGGAATGCTTTCAAAAGTCAAAGAAA  
GGCTCAAATATCAATATATATATTTTAGGATATTTTAGGGCCCTAGAACGCAAAAA  
AAGTGGGTGAACAAGAGTTGTCACGATAGGAAAGAGAAATGACTATAAGGAAC

● No. 43

TCTTGCTGCGACAAGCAGCTTAGGAATGAATCTAAGAAATTTAGGTCTCTGCCCCGCTT  
GAAAGATTCTTCTTTCCTATTTCGGTGAAAGAGGGCAAAGGTGTGTAGGAGAAAGAAT  
TCTAAAAACGTCGACGCTTAATTCGCCCCCGAGGAATGCTTTCAAAAGTCAAAGAAA  
GGCTCAAATATCAATATATATATTTTAGGATATTTTAGGGCCCTAGAACGCAAAAA  
AAGTGGGTGAACAAGAGTTGTCACGATAGGAAAGAGAAATGACTATAAGGAAC

● No. 44

TCTTGCTGCGACAAGCAGCTTAGGAATGAATCTAAGAAATTTAGGTCTCTGCCCCGCTT  
GAAAGATTCTTCTTTCCTATTTCGGTGAAAGAGGGCAAAGGTGTGTAGGAGAAAGAAT  
TCTAAAAACGTCGACGCTTAATTCGCCCCCGAGGAATGCTTTCAAAAGTCAAAGAAA  
GGCTCAAATATCAATATATATATTTTAGGATATTTTAGGGCCCTAGAACGCAAAAA  
AAGTGGGTGAACAAGAGTTGTCACGATAGGAAAGAGAAATGACTATAAGGAAC

● No. 45

TCTTGCTGCGACAAGCAGCTTAGGAATGAATCTAAGAAATTTAGGTCTCTGCCCCGCTT  
GAAAGATTCTTCTTTCCTATTTCGGTGAAAGAGGGCAAAGGTGTGTAGGAGAAAGAAT  
TCTAAAAACGTCGACGCTTAATTCGCCCCCGAGGAATGCTTTCAAAAGTCAAAGAAA  
GGCTCAAATATCAATATATATATTTTAGGATATTTTAGGGCCCTAGAACGCAAAAA  
AAGTGGGTGAACAAGAGTTGTCACGATAGGAAAGAGAAATGACTATAAGGAAC

● No. 46

TCTTGCTGCGACAAGCAAGCTTAGGAATGAATCTAAGAAATTTAGGTCTCTGCCCCGCT  
TGAAAGATTCTTCTTTCCTATTCGGTGAAAGAGGGCAAAGGTGTGTAGGAGAAAGAA  
TTCTAAAAACGTCGACGCTTAATTCGCCCCCGAGGAATGCTTTCAAAAGTCAAAGAA  
AGGCTCAAATATCAATATATATATTTTAGGATATTTAGGGCCCTAGAACGCAAAAA  
AAAGTGGGTGAACAAGAGTTGTCACGATAGGAAAGAGAAATGACTATAAGGAAC

● No. 50

TCTTGCTGCGACAAGCAGCTTAGGAATGAATCTAAGAAATTTAGGTCTCTGCCCCGCTT  
GAAAGATTCTTCTTTCCTATTCGGTGAAAGAGGGCAAAGGTGTGTAGGAGAAAGAAT  
TCTAAAAACGTCGACGCTTAATTCGCCCCCGAGGAATGCTTTCAAAAGTCAAAGAAA  
GGCTCAAATATCAATATATATATTTTAGGATATTTAGGGCCCTAGAACGCAAAAAA  
AAGTGGGTGAACAAGAGTTGTCACGATAGGAAAGAGAAATGACTATAAGGAAC

● No. 55

TCTTGCTGCGACAAGCAGCTTAGGAATGAATCTAAGAAATTTAGGTCTCTGCCCCGCTT  
GAAAGATTCTTCTTTCCTATTCGGTGAAAGAGGGCAAAGGTGTGTAGGAGAAAGAAT  
TCTAAAAACGTCGACGCTTAATTCGCCCCCGAGGAATGCTTTCAAAAGTCAAAGAAA  
GGCTCAAATATCAATATATATATTTTAGGATATTTAGGGCCCTAGAACGCAAAAAA  
AAGTGGGTGAACAAGAGTTGTCACGATAGGAAAGAGAAATGACTATAAGGAAC

● No. 56

TCTTGCTGCGACAAGCAGCTTAGGAATGAATCTAAGAAATTTAGGTCTCTGCCCCGCTT  
GAAAGATTCTTCTTTCCTATTCGGTGAAAGAGGGCAAAGGTGTGTAGGAGAAAGAAT  
TCTAAAAACGTCGACGCTTAATTCGCCCCCGAGGAATGCTTTCAAAAGTCAAAGAAA  
GGCTCAAATATCAATATATATATTTTAGGATATTTAGGGCCCTAGAACGCAAAAAA  
AAGTGGGTGAACAAGAGTTGTCACGATAGGAAAGAGAAATGACTATAAGGAAC

● No. 57

TCTTGCTGCGACAAGCAAGCTTAGGAATGAATCTAAGAAATTTAGGTCTCTGCCCCGCT  
TGAAAGATTCTTCTTTCCTATTCGGTGAAAGAGGGCAAAGGTGTGTAGGAGAAAGAA  
TTCTAAAAACGTCGACGCTTAATTCGCCCCCGAGGAATGCTTTCAAAAGTCAAAGAA  
AGGCTCAAATATCAATATATATATTTTAGGATATTTAGGGCCCTAGAACGCAAAAA  
AAAGTGGGTGAACAAGAGTTGTCACGATAGGAAAGAGAAATGACTATAAGGAAC

● No. 58

TCTTGCTGCGACAAGCAGCTTAGGAATGAATCTAAGAAATTTAGGTCTCTGCCCCGCTT  
GAAAGATTCTTCTTTCCTATTCGGTGAAAGAGGGCAAAGGTGTGTAGGAGAAAGAAT  
TCTAAAAACGTCGACGCTTAATTCGCCCCCGAGGAATGCTTTCAAAAGTCAAAGAAA  
GGCTCAAATATCAATATATATATTTTAGGATATTTAGGGCCCTAGAACGCAAAAAA  
AAGTGGGTGAACAAGAGTTGTCACGATAGGAAAGAGAAATGACTATAAGGAAC

● No. 59

TCTTGCTGCGACAAGCAAGCTTAGGAATGAATCTAAGAAATTTAGGTCTCTGCCCCGCT  
TGAAAGATTCTTCTTTCCTATTCGGTGAAAGAGGGCAAAGGTGTGTAGGAGAAAGAA  
TTCTAAAAACGTCGACGCTTAATTCGCCCCCGAGGAATGCTTTCAAAAGTCAAAGAA  
AGGCTCAAATATCAATATATATATTTTAGGATATTTAGGGCCCTAGAACGCAAAAA  
AAAGTGGGTGAACAAGAGTTGTCACGATAGGAAAGAGAAATGACTATAAGGAAC

● No. 60

TCTTGCTGCGACAAGCAGCTTAGGAATGAATCTAAGAAATTTAGGTCTCTGCCCCGCTT

GAAAGATTCTTCTTTCCTATTTCGGTGAAAGAGGGCAAAGGTGTGTAGGAGAAAGAAT  
TCTAAAAACGTCGACGCTTAATTCGCCCCCGAGGAATGCTTTCAAAAGTCAAAGAAA  
GGCTCAAATATCAATATATATATTTTAGGATATTTTAGGGCCCTAGAACGCAAAAAA  
AAGTGGGTGAACAAGAGTTGTCACGATAGGAAAGAGAAATGACTATAAGGAAC

● No. 61

TCTTGCTGCGACAAGCAAGCTTAGGAATGAATCTAAGAAATTTAGGTCTCTGCCCCGCT  
TGAAAGATTCTTCTTTCCTATTTCGGTGAAAGAGGGCAAAGGTGTGTAGGAGAAAGAA  
TTCTAAAAACGTCGACGCTTAATTCGCCCCCGAGGAATGCTTTCAAAAGTCAAAGAA  
AGGCTCAAATATCAATATATATATTTTAGGATATTTTAGGGCCCTAGAACGCAAAAAA  
AAAGTGGGTGAACAAGAGTTGTCACGATAGGAAAGAGAAATGACTATAAGGAAC

● No. 62

TCTTGCTGCGACAAGCAGCTTAGGAATGAATCTAAGAAATTTAGGTCTCTGCCCCGCTT  
GAAAGATTCTTCTTTCCTATTTCGGTGAAAGAGGGCAAAGGTGTGTAGGAGAAAGAAT  
TCTAAAAACGTCGACGCTTAATTCGCCCCCGAGGAATGCTTTCAAAAGTCAAAGAAA  
GGCTCAAATATCAATATATATATTTTAGGATATTTTAGGGCCCTAGAACGCAAAAAA  
AAGTGGGTGAACAAGAGTTGTCACGATAGGAAAGAGAAATGACTATAAGGAAC

● No. 63

TCTTGCTGCGACAAGCAGCTTAGGAATGAATCTAAGAAATTTAGGTCTCTGCCCCGCTT  
GAAAGATTCTTCTTTCCTATTTCGGTGAAAGAGGGCAAAGGTGTGTAGGAGAAAGAAT  
TCTAAAAACGTCGACGCTTAATTCGCCCCCGAGGAATGCTTTCAAAAGTCAAAGAAA  
GGCTCAAATATCAATATATATATTTTAGGATATTTTAGGGCCCTAGAACGCAAAAAA  
AAGTGGGTGAACAAGAGTTGTCACGATAGGAAAGAGAAATGACTATAAGGAAC

● No. 64

TCTTGCTGCGACAAGCAGCTTAGGAATGAATCTAAGAAATTTAGGTCTCTGCCCCGCTT  
GAAAGATTCTTCTTTCCTATTTCGGTGAAAGAGGGCAAAGGTGTGTAGGAGAAAGAAT  
TCTAAAAACGTCGACGCTTAATTCGCCCCCGAGGAATGCTTTCAAAAGTCAAAGAAA  
GGCTCAAATATCAATATATATATTTTAGGATATTTTAGGGCCCTAGAACGCAAAAAA  
AAGTGGGTGAACAAGAGTTGTCACGATAGGAAAGAGAAATGACTATAAGGAAC

● No. 65

TCTTGCTGCGACAAGCAGCTTAGGAATGAATCTAAGAAATTTAGGTCTCTGCCCCGCTT  
GAAAGATTCTTCTTTCCTATTTCGGTGAAAGAGGGCAAAGGTGTGTAGGAGAAAGAAT  
TCTAAAAACGTCGACGCTTAATTCGCCCCCGAGGAATGCTTTCAAAAGTCAAAGAAA  
GGCTCAAATATCAATATATATATTTTAGGATATTTTAGGGCCCTAGAACGCAAAAAA  
AAGTGGGTGAACAAGAGTTGTCACGATAGGAAAGAGAAATGACTATAAGGAAC

● No. 66

TCTTGCTGCGACAAGCAAGCTTAGGAATGAATCTAAGAAATTTAGGTCTCTGCCCCGCT  
TGAAAGATTCTTCTTTCCTATTTCGGTGAAAGAGGGCAAAGGTGTGTAGGAGAAAGAA  
TTCTAAAAACGTCGACGCTTAATTCGCCCCCGAGGAATGCTTTCAAAAGTCAAAGAA  
AGGCTCAAATATCAATATATATATTTTAGGATATTTTAGGGCCCTAGAACGCAAAAAA  
AAAGTGGGTGAACAAGAGTTGTCACGATAGGAAAGAGAAATGACTATAAGGAAC

● No. 67

TCTTGCTGCGACAAGCAAGCTTAGGAATGAATCTAAGAAATTTAGGTCTCTGCCCCGCT  
TGAAAGATTCTTCTTTCCTATTTCGGTGAAAGAGGGCAAAGGTGTGTAGGAGAAAGAA  
TTCTAAAAACGTCGACGCTTAATTCGCCCCCGAGGAATGCTTTCAAAAGTCAAAGAA

AGGCTCAAATATCAATATATATATTTTAGGATATTTTAGGGCCCTAGAACGCAAAAA  
AAAGTGGGTGAACAAGAGTTGTCACGATAGGAAAGAGAAATGACTATAAGGAAC

● No. 68

TCTTGCTGCGACAAGCAAGCTTAGGAATGAATCTAAGAAATTTAGGTCTCTGCCCCGCT  
TGAAAGATTCTTCTTTCCTATTTCGGTGAAAGAGGGCAAAGGTGTGTAGGAGAAAGAA  
TTCTAAAAACGTCGACGCTTAATTCGCCCCCGAGGAATGCTTTCAAAAGTCAAAGAA  
AGGCTCAAATATCAATATATATATTTTAGGATATTTTAGGGCCCTAGAACGCAAAAA  
AAAGTGGGTGAACAAGAGTTGTCACGATAGGAAAGAGAAATGACTATAAGGAAC

● No. 69

TCTTGCTGCGACAAGCAGCTTAGGAATGAATCTAAGAAATTTAGGTCTCTGCCCCGCTT  
GAAAGATTCTTCTTTCCTATTTCGGTGAAAGAGGGCAAAGGTGTGTAGGAGAAAGAAT  
TCTAAAAACGTCGACGCTTAATTCGCCCCCGAGGAATGCTTTCAAAAGTCAAAGAAA  
GGCTCAAATATCAATATATATATTTTAGGATATTTTAGGGCCCTAGAACGCAAAAA  
AAGTGGGTGAACAAGAGTTGTCACGATAGGAAAGAGAAATGACTATAAGGAAC

● No. 70

TCTTGCTGCGACAAGCAAGCTTAGGAATGAATCTAAGAAATTTAGGTCTCTGCCCCGCT  
TGAAAGATTCTTCTTTCCTATTTCGGTGAAAGAGGGCAAAGGTGTGTAGGAGAAAGAA  
TTCTAAAAACGTCGACGCTTAATTCGCCCCCGAGGAATGCTTTCAAAAGTCAAAGAA  
AGGCTCAAATATCAATATATATATTTTAGGATATTTTAGGGCCCTAGAACGCAAAAA  
AAAGTGGGTGAACAAGAGTTGTCACGATAGGAAAGAGAAATGACTATAAGGAAC

● No. 71

TCTTGCTGCGACAAGCAAGCTTAGGAATGAATCTAAGAAATTTAGGTCTCTGCCCCGCT  
TGAAAGATTCTTCTTTCCTATTTCGGTGAAAGAGGGCAAAGGTGTGTAGGAGAAAGAA  
TTCTAAAAACGTCGACGCTTAATTCGCCCCCGAGGAATGCTTTCAAAAGTCAAAGAA  
AGGCTCAAATATCAATATATATATTTTAGGATATTTTAGGGCCCTAGAACGCAAAAA  
AAAGTGGGTGAACAAGAGTTGTCACGATAGGAAAGAGAAATGACTATAAGGAAC

● No. 72

TCTTGCTGCGACAAGCAGCTTAGGAATGAATCTAAGAAATTTAGGTCTCTGCCCCGCTT  
GAAAGATTCTTCTTTCCTATTTCGGTGAAAGAGGGCAAAGGTGTGTAGGAGAAAGAAT  
TCTAAAAACGTCGACGCTTAATTCGCCCCCGAGGAATGCTTTCAAAAGTCAAAGAAA  
GGCTCAAATATCAATATATATATTTTAGGATATTTTAGGGCCCTAGAACGCAAAAA  
AAGTGGGTGAACAAGAGTTGTCACGATAGGAAAGAGAAATGACTATAAGGAAC

● No. 77

TCTTGCTGCGACAAGCAGCTTAGGAATGAATCTAAGAAATTTAGGTCTCTGCCCCGCTT  
GAAAGATTCTTCTTTCCTATTTCGGTGAAAGAGGGCAAAGGTGTGTAGGAGAAAGAAT  
TCTAAAAACGTCGACGCTTAATTCGCCCCCGAGGAATGCTTTCAAAAGTCAAAGAAA  
GGCTCAAATATCAATATATATATTTTAGGATATTTTAGGGCCCTAGAACGCAAAAA  
AAGTGGGTGAACAAGAGTTGTCACGATAGGAAAGAGAAATGACTATAAGGAAC

● No. 78

TCTTGCTGCGACAAGCAGCTTAGGAATGAATCTAAGAAATTTAGGTCTCTGCCCCGCTT  
GAAAGATTCTTCTTTCCTATTTCGGTGAAAGAGGGCAAAGGTGTGTAGGAGAAAGAAT  
TCTAAAAACGTCGACGCTTAATTCGCCCCCGAGGAATGCTTTCAAAAGTCAAAGAAA  
GGCTCAAATATCAATATATATATTTTAGGATATTTTAGGGCCCTAGAACGCAAAAA  
AAGTGGGTGAACAAGAGTTGTCACGATAGGAAAGAGAAATGACTATAAGGAAC

● No. 79

TCTTGCTGCGACAAGCAAGCTTAGGAATGAATCTAAGAAATTTAGGTCTCTGCCCCGCT  
TGAAAGATTCTTCTTTCCTATTCGGTGAAAGAGGGCAAAGGTGTGTAGGAGAAAGAA  
TTCTAAAAACGTCGACGCTTAATTCGCCCCCGAGGAATGCTTTCAAAAGTCAAAGAA  
AGGCTCAAATATCAATATATATATTTTAGGATATTTTAGGGCCCTAGAACGCAAAAA  
AAAGTGGGTGAACAAGAGTTGTCACGATAGGAAAGAGAAATGACTATAAGGAAC

● No. 80

TCTTGCTGCGACAAGCAAGCTTAGGAATGAATCTAAGAAATTTAGGTCTCTGCCCCGCT  
TGAAAGATTCTTCTTTCCTATTCGGTGAAAGAGGGCAAAGGTGTGTAGGAGAAAGAA  
TTCTAAAAACGTCGACGCTTAATTCGCCCCCGAGGAATGCTTTCAAAAGTCAAAGAA  
AGGCTCAAATATCAATATATATATTTTAGGATATTTTAGGGCCCTAGAACGCAAAAA  
AAAGTGGGTGAACAAGAGTTGTCACGATAGGAAAGAGAAATGACTATAAGGAAC

● No. 82

TCTTGCTGCGACAAGCAAGCTTAGGAATGAATCTAAGAAATTTAGGTCTCTGCCCCGCT  
TGAAAGATTCTTCTTTCCTATTCGGTGAAAGAGGGCAAAGGTGTGTAGGAGAAAGAA  
TTCTAAAAACGTCGACGCTTAATTCGCCCCCGAGGAATGCTTTCAAAAGTCAAAGAA  
AGGCTCAAATATCAATATATATATTTTAGGATATTTTAGGGCCCTAGAACGCAAAAA  
AAAGTGGGTGAACAAGAGTTGTCACGATAGGAAAGAGAAATGACTATAAGGAAC

● No. 83

TCTTGCTGCGACAAGCAGCTTAGGAATGAATCTAAGAAATTTAGGTCTCTGCCCCGCTT  
GAAAGATTCTTCTTTCCTATTCGGTGAAAGAGGGCAAAGGTGTGTAGGAGAAAGAAT  
TCTAAAAACGTCGACGCTTAATTCGCCCCCGAGGAATGCTTTCAAAAGTCAAAGAAA  
GGCTCAAATATCAATATATATATTTTAGGATATTTTAGGGCCCTAGAACGCAAAAA  
AAGTGGGTGAACAAGAGTTGTCACGATAGGAAAGAGAAATGACTATAAGGAAC

● No. 84

TCTTGCTGCGACAAGCAAGCTTAGGAATGAATCTAAGAAATTTAGGTCTCTGCCCCGCT  
TGAAAGATTCTTCTTTCCTATTCGGTGAAAGAGGGCAAAGGTGTGTAGGAGAAAGAA  
TTCTAAAAACGTCGACGCTTAATTCGCCCCCGAGGAATGCTTTCAAAAGTCAAAGAA  
AGGCTCAAATATCAATATATATATTTTAGGATATTTTAGGGCCCTAGAACGCAAAAA  
AAAGTGGGTGAACAAGAGTTGTCACCGATAGGAAAGAAGAAATGGACTTAATAAG

● No. 85

TCTTGCTGCGACAAGCAGCTTAGGAATGAATCTAAGAAATTTAGGTCTCTGCCCCGCTT  
GAAAGATTCTTCTTTCCTATTCGGTGAAAGAGGGCAAAGGTGTGTAGGAGAAAGAAT  
TCTAAAAACGTCGACGCTTAATTCGCCCCCGAGGAATGCTTTCAAAAGTCAAAGAAA  
GGCTCAAATATCAATATATATATTTTAGGATATTTTAGGGCCCTAGAACGCAAAAA  
AAGTGGGTGAACAAGAGTTGTCACGATAGGAAAGAGAAATGACTATAAGGAAC
