# Supplementary material for: Genetic Diversity in Oilseed and Vegetable Mustard (Brassica juncea L.) Accessions Revealed by Nuclear and Mitochondrial Molecular Markers
Source: MDPI journal article supplement (doi:10.3390/agronomy13030919), 2023-03-20
Supplement: s1 [file s1 › Figure S2.pdf]

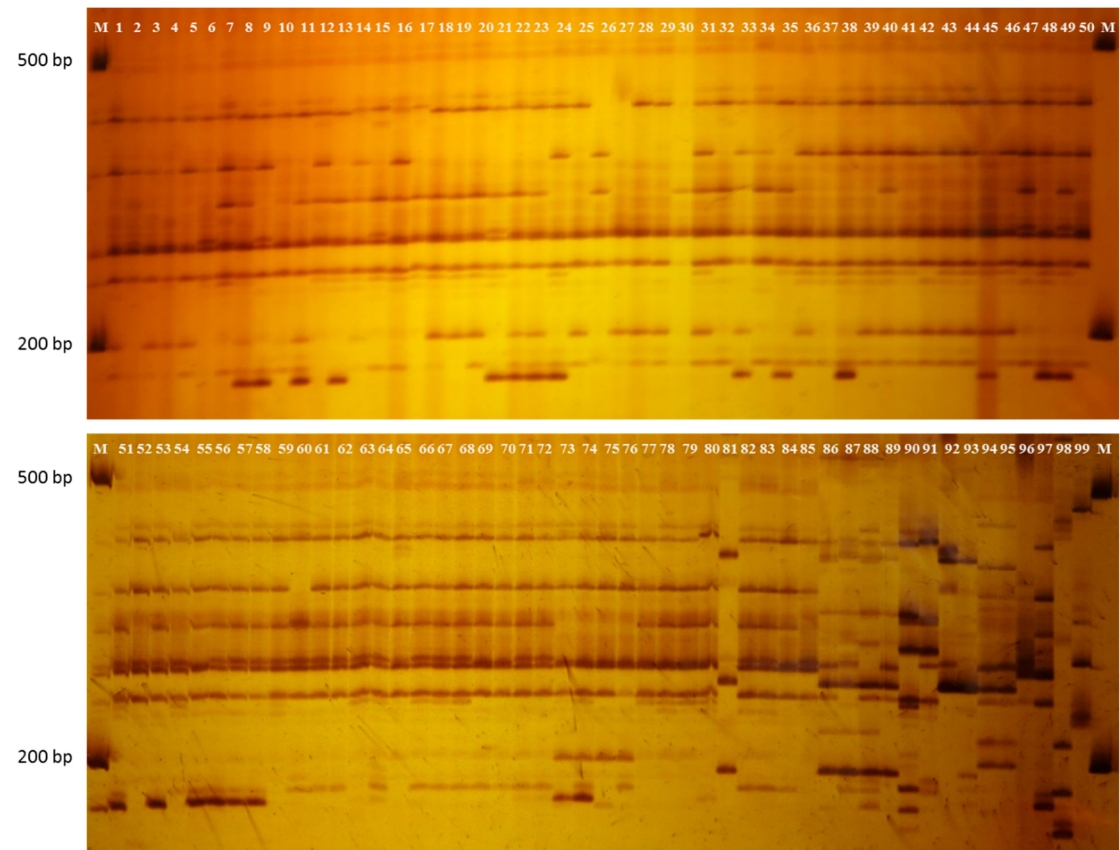

**Figure S2.** PCR amplification of the tested accessions using the SSR primer BrgMS426. M, marker; the accession numbers are shown in Table S1.
