# Supplementary material for: Genetic Diversity in Oilseed and Vegetable Mustard (Brassica juncea L.) Accessions Revealed by Nuclear and Mitochondrial Molecular Markers
Source: MDPI journal article supplement (doi:10.3390/agronomy13030919), 2023-03-20
Supplement: s1 [file s1 › Figure S5.pdf]

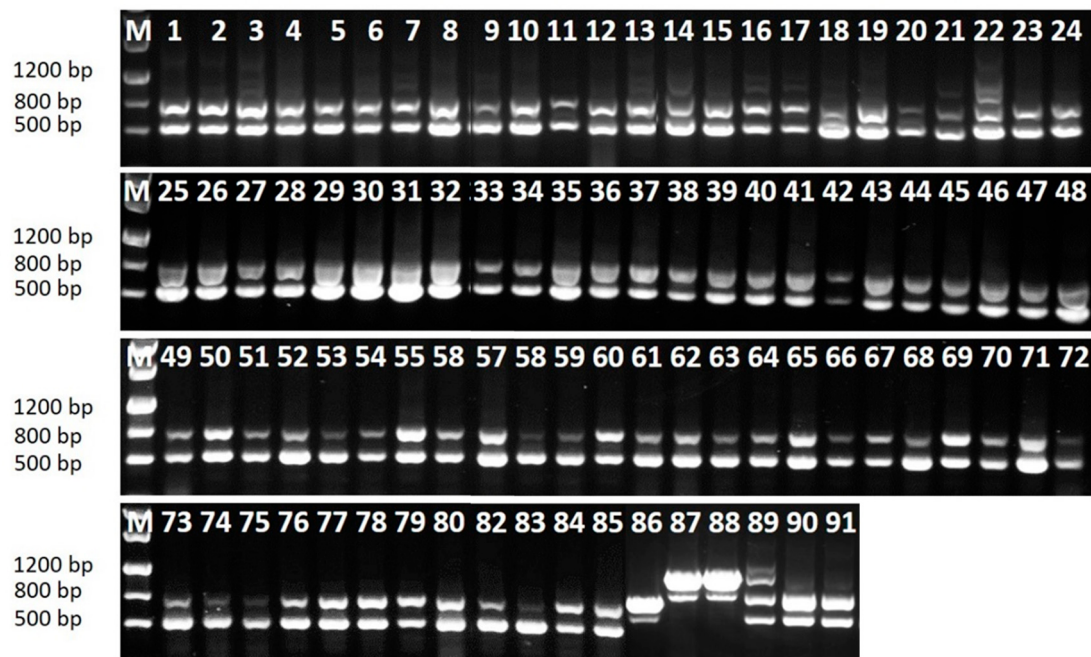

**Figure S5.** Results of multiplex PCR amplification for the tested accessions. M, marker; the accession numbers are shown in Table S1.
