# Supplementary material for: Genetic Diversity in Oilseed and Vegetable Mustard (Brassica juncea L.) Accessions Revealed by Nuclear and Mitochondrial Molecular Markers
Source: MDPI journal article supplement (doi:10.3390/agronomy13030919), 2023-03-20
Supplement: s1 [file s1 › Table S1.pdf]

**Table S1.** Plant materials used in the present study

| No. | Name             | Code  | Species                                                                    | Origin         | Seed color | Group | Cyto-type  | Mito-type |
|-----|------------------|-------|----------------------------------------------------------------------------|----------------|------------|-------|------------|-----------|
| 1   | 2598-1           | 7B003 | <i>Brassica juncea</i> ssp. <i>juncea</i> var. <i>gracilis</i> Tsen et Lee | Inner Mongolia | yellow     | I-2   | <i>cam</i> | MT3       |
| 2   | 2598-2           | 7B061 | <i>B. juncea</i> ssp. <i>juncea</i> var. <i>gracilis</i>                   | Inner Mongolia | yellow     | I-1   | <i>cam</i> | MT2       |
| 3   | 2598-3           | 7B012 | <i>B. juncea</i> ssp. <i>juncea</i> var. <i>gracilis</i>                   | Inner Mongolia | yellow     | I-1   | <i>cam</i> | MT3       |
| 4   | Yuanjie-1S       | 7B045 | <i>B. juncea</i> ssp. <i>juncea</i> var. <i>gracilis</i>                   | Shaanxi        | dark       | I-2   | <i>cam</i> | MT1       |
| 5   | Quely-2          | 7B001 | <i>B. juncea</i> ssp. <i>juncea</i> var. <i>gracilis</i>                   | Shaanxi        | dark       | I-2   | <i>cam</i> | MT3       |
| 6   | Dafangkuyoucai-1 | 7B024 | <i>B. juncea</i> ssp. <i>juncea</i> var. <i>gracilis</i>                   | Guizhou        | yellow     | I-1   | <i>cam</i> | MT3       |
| 7   | Dafangkuyoucai-3 | 7B057 | <i>B. juncea</i> ssp. <i>juncea</i> var. <i>gracilis</i>                   | Guizhou        | yellow     | I-1   | <i>cam</i> | MT2       |
| 8   | Fanqixiaohuang   | 7B016 | <i>B. juncea</i> ssp. <i>juncea</i> var. <i>gracilis</i>                   | Shanxi         | yellow     | I-1   | <i>cam</i> | MT2       |
| 9   | Huayeyoucai-3    | 7B032 | <i>B. juncea</i> ssp. <i>juncea</i> var. <i>gracilis</i>                   | Shaanxi        | dark       | I-3   | <i>cam</i> | MT1       |
| 10  | Huairenyocai-1   | 7B017 | <i>B. juncea</i> ssp. <i>juncea</i> var. <i>gracilis</i>                   | Shaanxi        | yellow     | I-1   | <i>cam</i> | MT2       |
| 11  | Huairenyocai-2   | 7B055 | <i>B. juncea</i> ssp. <i>juncea</i> var. <i>gracilis</i>                   | Shaanxi        | yellow     | I-1   | <i>cam</i> | MT2       |
| 12  | Laifengmawei     | 7B020 | <i>B. juncea</i> ssp. <i>juncea</i> var. <i>gracilis</i>                   | Guizhou        | dark       | I-1   | <i>cam</i> | MT3       |
| 13  | Pudingkuyoucai   | 7B026 | <i>B. juncea</i> ssp. <i>juncea</i> var. <i>gracilis</i>                   | Guizhou        | yellow     | I-3   | <i>cam</i> | MT2       |
| 14  | Qianxiniuwei-1   | 7B059 | <i>B. juncea</i> ssp. <i>juncea</i> var. <i>gracilis</i>                   | Guizhou        | yellow     | I-2   | <i>cam</i> | MT2       |
| 15  | Qianxiniuwei-2   | 7B066 | <i>B. juncea</i> ssp. <i>juncea</i> var. <i>gracilis</i>                   | Guizhou        | yellow     | I-3   | <i>cam</i> | MT2       |
| 16  | Qianxiniuwei-3   | 7B005 | <i>B. juncea</i> ssp. <i>juncea</i> var. <i>gracilis</i>                   | Guizhou        | yellow     | I-1   | <i>cam</i> | MT2       |
| 17  | Qianxiniuwei-4   | 7B025 | <i>B. juncea</i> ssp. <i>juncea</i> var. <i>gracilis</i>                   | Guizhou        | yellow     | I-3   | <i>cam</i> | MT2       |
| 18  | Qinghaiyejie-1   | 7B014 | <i>B. juncea</i> ssp. <i>juncea</i> var. <i>gracilis</i>                   | Qinhai         | dark       | I-1   | <i>cam</i> | MT3       |
| 19  | Qinghaiyejie-2   | 7B052 | <i>B. juncea</i> ssp. <i>juncea</i> var. <i>gracilis</i>                   | Qinhai         | dark       | I-1   | <i>cam</i> | MT3       |
| 20  | Qinghaiyejie-3   | 7B064 | <i>B. juncea</i> ssp. <i>juncea</i> var. <i>gracilis</i>                   | Qinhai         | dark       | I-1   | <i>cam</i> | MT3       |
| 21  | Qinghaiyejie-4   | 7B065 | <i>B. juncea</i> ssp. <i>juncea</i> var. <i>gracilis</i>                   | Qinhai         | dark       | I-3   | <i>cam</i> | MT2       |
| 22  | Shaanbeihuangjie | 7B023 | <i>B. juncea</i> ssp. <i>juncea</i> var. <i>gracilis</i>                   | Shaanxi        | dark       | I-3   | <i>cam</i> | MT2       |
| 23  | Shanji-1         | 7B019 | <i>B. juncea</i> (L.) Coss. var. <i>gracilis</i> Tsen et Lee               | Shaanxi        | yellow     | I-3   | <i>cam</i> | MT2       |

Table S1. Continued

| No. | Name                | Code  | Species                                                      | Origin   | Seed color | Group | Cyto-type  | Mito-type |
|-----|---------------------|-------|--------------------------------------------------------------|----------|------------|-------|------------|-----------|
| 24  | Shaanjie-2          | 7B044 | <i>B. juncea</i> ssp. <i>juncea</i> var. <i>gracilis</i>     | Shaanxi  | yellow     | I-2   | <i>cam</i> | MT1       |
| 25  | Weiyuandahuangjie-1 | 7B056 | <i>B. juncea</i> ssp. <i>juncea</i> var. <i>gracilis</i>     | Gansu    | dark       | I-1   | <i>cam</i> | MT1       |
| 26  | Weiyuandahuangjie-2 | 7B002 | <i>B. juncea</i> ssp. <i>juncea</i> var. <i>gracilis</i>     | Gansu    | dark       | I-2   | <i>cam</i> | MT2       |
| 27  | Weiyuandahuangjie-3 | 7B013 | <i>B. juncea</i> ssp. <i>juncea</i> var. <i>gracilis</i>     | Gansu    | dark       | I-1   | <i>cam</i> | MT1       |
| 28  | Weiyuandahuangjie-4 | 7B018 | <i>B. juncea</i> ssp. <i>juncea</i> var. <i>gracilis</i>     | Gansu    | dark       | I-2   | <i>cam</i> | MT1       |
| 29  | Weiyuandahuangjie-5 | 7B037 | <i>B. juncea</i> ssp. <i>juncea</i> var. <i>gracilis</i>     | Gansu    | dark       | I-3   | <i>cam</i> | MT1       |
| 30  | Weiyuanyoucai       | 7B051 | <i>B. juncea</i> ssp. <i>juncea</i> var. <i>gracilis</i>     | Gansu    | dark       | I-1   | <i>cam</i> | MT2       |
| 31  | Wenxiyoucai-1       | 7B015 | <i>B. juncea</i> ssp. <i>juncea</i> var. <i>gracilis</i>     | Shanxi   | yellow     | I-1   | <i>cam</i> | MT3       |
| 32  | Wenxiyoucai-2       | 7B053 | <i>B. juncea</i> ssp. <i>juncea</i> var. <i>gracilis</i>     | Shanxi   | yellow     | I-1   | <i>cam</i> | MT2       |
| 33  | Wenxiyoucai-3       | 7B054 | <i>B. juncea</i> ssp. <i>juncea</i> var. <i>gracilis</i>     | Shanxi   | yellow     | I-1   | <i>cam</i> | MT2       |
| 34  | Xinjiang 2          | 7B062 | <i>B. juncea</i> ssp. <i>juncea</i> var. <i>gracilis</i>     | Xinjiang | dark       | I-1   | <i>cam</i> | MT2       |
| 35  | Xinjiang 4          | 7B063 | <i>B. juncea</i> ssp. <i>juncea</i> var. <i>gracilis</i>     | Xinjiang | dark       | I-2   | <i>cam</i> | MT2       |
| 36  | Yeshengxingjiecai-1 | 7B041 | <i>B. juncea</i> ssp. <i>juncea</i> var. <i>gracilis</i>     | Shaanxi  | dark       | I-2   | <i>cam</i> | MT1       |
| 37  | Yeshengxingjiecai-2 | 7B004 | <i>B. juncea</i> ssp. <i>juncea</i> var. <i>gracilis</i>     | Shaanxi  | dark       | I-2   | <i>cam</i> | MT3       |
| 38  | Yuanjie-1           | 7B007 | <i>B. juncea</i> ssp. <i>juncea</i> var. <i>gracilis</i>     | Shaanxi  | dark       | I-1   | <i>cam</i> | MT1       |
| 39  | Yuanjie-2           | 7B008 | <i>B. juncea</i> ssp. <i>juncea</i> var. <i>gracilis</i>     | Shaanxi  | dark       | I-1   | <i>cam</i> | MT1       |
| 40  | Yuanjie-3           | 7B046 | <i>B. juncea</i> ssp. <i>juncea</i> var. <i>gracilis</i>     | Shaanxi  | dark       | I-1   | <i>cam</i> | MT1       |
| 41  | Yuanjie-2S          | 7B009 | <i>B. juncea</i> ssp. <i>juncea</i> var. <i>gracilis</i>     | Shaanxi  | dark       | I-2   | <i>cam</i> | MT1       |
| 42  | Weiyuandahuangjie-6 | 7B038 | <i>B. juncea</i> ssp. <i>juncea</i> var. <i>gracilis</i>     | Gansu    | dark       | I-3   | <i>cam</i> | MT3       |
| 43  | Yuanjie-5           | 7B010 | <i>B. juncea</i> ssp. <i>juncea</i> var. <i>gracilis</i>     | Shaanxi  | dark       | I-2   | <i>cam</i> | MT3       |
| 44  | Yuanjie-4           | 7B047 | <i>B. juncea</i> ssp. <i>juncea</i> var. <i>gracilis</i>     | Shaanxi  | dark       | I-2   | <i>cam</i> | MT3       |
| 45  | Yuanjie-7           | 7B011 | <i>B. juncea</i> ssp. <i>juncea</i> var. <i>gracilis</i>     | Shaanxi  | dark       | I-2   | <i>cam</i> | MT3       |
| 46  | Yuanjie-6           | 7B048 | <i>B. juncea</i> (L.) Coss. var. <i>gracilis</i> Tsen et Lee | Shaanxi  | dark       | I-2   | <i>cam</i> | MT3       |

Table S1. Continued

| No. | Name                   | Code  | Species                                                                     | Origin    | Seed color | Group | Cyto-type  | Mito-type |
|-----|------------------------|-------|-----------------------------------------------------------------------------|-----------|------------|-------|------------|-----------|
| 47  | Yieshengjie-1S         | 7B045 | <i>B. juncea</i> ssp. <i>juncea</i> var. <i>gracilis</i>                    | Shaanxi   | dark       | I-2   | <i>cam</i> | MT2       |
| 48  | Yieshengjie-2          | 7B050 | <i>B. juncea</i> ssp. <i>juncea</i> var. <i>gracilis</i>                    | Shaanxi   | dark       | I-2   | <i>cam</i> | MT1       |
| 49  | Weiyuandahuangjie-7    | 0B01  | <i>B. juncea</i> ssp. <i>juncea</i> var. <i>gracilis</i>                    | Gansu     | dark       | I-3   | <i>cam</i> | MT1       |
| 50  | Quelv-3                | 0B24  | <i>B. juncea</i> ssp. <i>juncea</i> var. <i>gracilis</i>                    | Shaanxi   | dark       | I-2   | <i>cam</i> | MT3       |
| 51  | Hengkoujie-1           | 0B08  | <i>B. juncea</i> ssp. <i>Integrifolia</i> var. <i>rugosa</i> Baily          | Shaanxi   | dark       | II-3  | <i>cam</i> | MT1       |
| 52  | Hengkoujie-2           | 0B02  | <i>B. juncea</i> ssp. <i>Integrifolia</i> var. <i>rugosa</i>                | Shaanxi   | dark       | II-3  | <i>cam</i> | MT1       |
| 53  | Hengkoujie-3           | 0B04  | <i>B. juncea</i> ssp. <i>Integrifolia</i> var. <i>rugosa</i>                | Shaanxi   | dark       | II-3  | <i>cam</i> | MT1       |
| 54  | Hengkoujie-4           | 0B05  | <i>B. juncea</i> ssp. <i>Integrifolia</i> var. <i>rugosa</i>                | Shaanxi   | dark       | II-3  | <i>cam</i> | MT1       |
| 55  | Mianxianjie-1          | 0B12  | <i>B. juncea</i> ssp. <i>Integrifolia</i> var. <i>rugosa</i>                | Shaanxi   | dark       | II-3  | <i>cam</i> | MT3       |
| 56  | Mianxianjie-2          | 0B14  | <i>B. juncea</i> ssp. <i>Integrifolia</i> var. <i>rugosa</i>                | Shaanxi   | dark       | II-3  | <i>cam</i> | MT3       |
| 57  | Mianxianjie-3          | 0B15  | <i>B. juncea</i> ssp. <i>Integrifolia</i> var. <i>rugosa</i>                | Shaanxi   | dark       | II-3  | <i>cam</i> | MT3       |
| 58  | Mianxianjie-4          | 0B18  | <i>B. juncea</i> ssp. <i>Integrifolia</i> var. <i>rugosa</i>                | Shaanxi   | dark       | II-3  | <i>cam</i> | MT3       |
| 59  | Hanzhongjie-1          | 0B21  | <i>B. juncea</i> ssp. <i>Integrifolia</i> var. <i>rugosa</i>                | Shaanxi   | dark       | II-2  | <i>cam</i> | MT3       |
| 60  | Hanzhongjie-2          | 0B23  | <i>B. juncea</i> ssp. <i>Integrifolia</i> var. <i>rugosa</i>                | Shaanxi   | dark       | II-2  | <i>cam</i> | MT3       |
| 61  | Texuankejiajie         | 0B49  | <i>B. juncea</i> ssp. <i>Integrifolia</i> var. <i>rugosa</i>                | Guangdong | dark       | II-2  | <i>cam</i> | MT3       |
| 62  | Sijietiankejiajie      | 0B51  | <i>B. juncea</i> ssp. <i>Integrifolia</i> var. <i>rugosa</i>                | Guangdong | dark       | II-2  | <i>cam</i> | MT3       |
| 63  | Sijietianchunca        | 0B50  | <i>B. juncea</i> ssp. <i>Integrifolia</i> var. <i>rugosa</i>                | Guangdong | dark       | II-2  | <i>cam</i> | MT3       |
| 64  | Dapinpubaoxinjiecai    | 0B35  | <i>B. juncea</i> ssp. <i>Integrifolia</i> var. <i>involuta</i> Yang et Chen | Shandong  | dark       | II-1  | <i>cam</i> | MT3       |
| 65  | Linongbaoxinjiecai     | 0B37  | <i>B. juncea</i> ssp. <i>Integrifolia</i> var. <i>involuta</i>              | Guangdong | dark       | II-1  | <i>cam</i> | MT3       |
| 66  | Baoxinqingcai          | 0B36  | <i>B. juncea</i> ssp. <i>Integrifolia</i> var. <i>involuta</i>              | Sichuan   | dark       | II-1  | <i>cam</i> | MT3       |
| 67  | Jinxuanshuidongjiecai  | 0B47  | <i>B. juncea</i> ssp. <i>Integrifolia</i> var. <i>involuta</i>              | Guangdong | dark       | II-1  | <i>cam</i> | MT3       |
| 68  | Qiannongshuidongjiecai | 0B48  | <i>B. juncea</i> ssp. <i>Integrifolia</i> var. <i>involuta</i>              | Guangdong | dark       | II-1  | <i>cam</i> | MT3       |

Table S1. Continued

| No. | Name                        | Code  | Species                                                                        | Origin    | Seed color | Group | Cyto-type       | Mito-type |
|-----|-----------------------------|-------|--------------------------------------------------------------------------------|-----------|------------|-------|-----------------|-----------|
| 69  | Zacai                       | 0B42  | <i>B. juncea</i> ssp. <i>tumida</i> var. <i>tumida</i> Tsen et Lee             | Zhejiang  | dark       | II-2  | <i>cam</i>      | MT3       |
| 70  | Zheyouzacai                 | 0B43  | <i>B. juncea</i> ssp. <i>tumida</i> var. <i>tumida</i>                         | Zhejiang  | dark       | II-2  | <i>cam</i>      | MT3       |
| 71  | Beifangzacai                | 0B45  | <i>B. juncea</i> ssp. <i>tumida</i> var. <i>tumida</i>                         | Hebei     | dark       | II-4  | <i>cam</i>      | MT3       |
| 72  | Meiweishuangkouzacai        | 0B46  | <i>B. juncea</i> ssp. <i>tumida</i> var. <i>tumida</i>                         | Beijing   | dark       | II-4  | <i>cam</i>      | MT3       |
| 73  | Changfengguangtoujiecai     | 0B55  | <i>B. juncea</i> ssp. <i>napiformis</i> var. <i>megarrhiza</i> Tsen et Lee     | Hebei     | dark       | II-5  | <i>cam</i>      | MT1       |
| 74  | Ribenguangjie               | 0B56  | <i>B. juncea</i> ssp. <i>napiformis</i> var. <i>megarrhiza</i>                 | Shandong  | dark       | II-5  | <i>cam</i>      | MT1       |
| 75  | Guangtoudajiecai            | 0B57  | <i>B. juncea</i> ssp. <i>napiformis</i> var. <i>megarrhiza</i>                 | Shandong  | dark       | II-5  | <i>cam</i>      | MT1       |
| 76  | Bendatoucai                 | 0B58  | <i>B. juncea</i> ssp. <i>napiformis</i> var. <i>megarrhiza</i>                 | Zhejiang  | dark       | II-5  | <i>cam</i>      | MT1       |
| 77  | Liujiecai                   | 0B34  | <i>B. juncea</i> ssp. <i>integrifolia</i> var. <i>strumata</i> Tsen et Lee     | Zhejiang  | dark       | II-1  | <i>cam</i>      | MT3       |
| 78  | Tiancuidanainaicaicai       | 0B38  | <i>B. juncea</i> ssp. <i>integrifolia</i> var. <i>strumata</i>                 | Guangdong | dark       | II-1  | <i>cam</i>      | MT3       |
| 79  | Fengbangliuliucacai         | 0B39  | <i>B. juncea</i> ssp. <i>integrifolia</i> var. <i>strumata</i>                 | Jiangsu   | dark       | II-1  | <i>cam</i>      | MT3       |
| 80  | Baipibangcai                | 0B40  | <i>B. juncea</i> ssp. <i>integrifolia</i> var. <i>crassicauli</i> Chen et Yang | Sichuan   | dark       | II-1  | <i>cam</i>      | MT3       |
| 81  | Tecutiaojinsunchishoujielan | 0B41  | <i>B. oleracea</i>                                                             | Guangdong | dark       | III   | <i>Bol-type</i> | MT2       |
| 82  | Ercai                       | 0B32  | <i>B. juncea</i> ssp. <i>integrifolia</i> var. <i>gemmaifera</i> Lee et Lin    | Zhejiang  | dark       | II-6  | <i>cam</i>      | MT3       |
| 83  | Nenxiangercai               | 0B33  | <i>B. juncea</i> ssp. <i>integrifolia</i> var. <i>gemmaifera</i>               | Sichuan   | dark       | II-1  | <i>cam</i>      | MT3       |
| 84  | Jiutouniaoxuelihong         | 0B53  | <i>B. juncea</i> ssp. <i>integrifolia</i> var. <i>multiceps</i> Tsen et Lee    | Jiangsu   | dark       | II-2  | <i>cam</i>      | MT3       |
| 85  | Xiyexueuelihong             | 0B54  | <i>B. juncea</i> ssp. <i>integrifolia</i> var. <i>multiceps</i>                | Jiangsu   | dark       | II-2  | <i>cam</i>      | MT3       |
| 86  | SH11                        | 6C206 | <i>B. napus</i>                                                                | Shaanxi   | dark       | III   | <i>pol</i>      | MT1       |
| 87  | Q7C                         | 6C242 | <i>B. napus</i>                                                                | Shaanxi   | dark       | III   | <i>nap</i>      | MT4       |
| 88  | Zhong 9                     | 6C21  | <i>B. napus</i>                                                                | Hubei     | dark       | III   | <i>nap</i>      | MT4       |
| 89  | Zhong 2                     | 6C05  | <i>B. napus</i>                                                                | Hubei     | dark       | III   | <i>cam</i>      | MT1       |
| 90  | Jinqiu 66                   | 7A088 | <i>B. rapa</i>                                                                 | Shaanxi   | dark       | III   | <i>cam</i>      | MT1       |

Table S1. Continued

| No. | Name              | Code  | Species                       | Origin         | Seed color | Group | Cyto-type       | Mito-type |
|-----|-------------------|-------|-------------------------------|----------------|------------|-------|-----------------|-----------|
| 91  | Baiyv             | 7A186 | <i>B. rapa</i>                | Shaanxi        | dark       | III   | <i>cam</i>      | MT1       |
| 92  | Texuanzhonggan 11 | 7E108 | <i>B. oleracea</i>            | Beijing        | dark       | III   | <i>Bol-type</i> | MT2       |
| 93  | Ganlan X02-3658   | 7E109 | <i>B. oleracea</i>            | Shaanxi        | dark       | III   | <i>Bol-type</i> | MT2       |
| 94  | BC-02             | 7B075 | <i>B. carinata</i>            | Czech Republic | yellow     | III   | <i>Bni-type</i> | MT1       |
| 95  | Dodalla           | 7B076 | <i>B. carinata</i>            | Canada         | brown      | III   | <i>Bni-type</i> | MT1       |
| 96  | CBRC29337         | 7B078 | <i>B. nigra</i>               | Canada         | dark       | III   | <i>Bni-type</i> | MT1       |
| 97  | CZ1405            | 7B080 | <i>B. nigra</i>               | Czech Republic | dark       | III   | <i>Bni-type</i> | MT1       |
| 98  | Yunjie            | 7B036 | <i>Eruca sativa</i> Mill      | Shaanxi        | dark       | III   | <i>Esa-type</i> | MT1       |
| 99  | Banlangen         | 7B034 | <i>Isatis indigotica</i> Fort | Shaanxi        | dark       | III   | <i>In-type</i>  | MT1       |
