# Supplementary material for: Genetic Diversity in Oilseed and Vegetable Mustard (Brassica juncea L.) Accessions Revealed by Nuclear and Mitochondrial Molecular Markers
Source: MDPI journal article supplement (doi:10.3390/agronomy13030919), 2023-03-20
Supplement: s1 [file s1 › Table S2.pdf]

**Table S2.** Information of 20 pairs of sequence related amplified polymorphism (SRAP) primers

| SRAP primers | Forward//Reserve primer sequence<br>(5'-3') | Polymorphic<br>fragments | Size range of amplified<br>fragments (bp) | PIC   | NA    | NE    | H     | I      |
|--------------|---------------------------------------------|--------------------------|-------------------------------------------|-------|-------|-------|-------|--------|
| Em1Me18      | TGAGTCCAAACCGGAAG //<br>GACTGCGTACGAATTATT  | 5                        | 200-800                                   | 0.704 | 1.899 | 1.487 | 0.302 | 0.461  |
| Em4Me1       | TGAGTCCAAACCGGATA //<br>GACTGCGTACGAATTTGA  | 4                        | 200-500                                   | 0.664 | 1.647 | 1.392 | 0.232 | 0.348  |
| Em4Me2       | TGAGTCCAAACCGGAGC //<br>GACTGCGTACGAATTTGA  | 7                        | 500-1200                                  | 0.800 | 1.989 | 1.634 | 0.368 | 0.546  |
| Em4Me8       | TGAGTCCAAACCGGTGC //<br>GACTGCGTACGAATTTGA  | 4                        | 100-800                                   | 0.659 | 1.858 | 1.585 | 0.334 | 0.491  |
| Em5Me21      | CTGGCGAACTCCGGATG//<br>GACTGCGTACGAATTAAC   | 7                        | 200-1200                                  | 0.829 | 1.929 | 1.476 | 0.298 | 0.459  |
| Em5Me22      | GGTGAACGCTCCGGAAG //<br>GACTGCGTACGAATTAAC  | 4                        | 200-1200                                  | 0.697 | 1.545 | 1.411 | 0.225 | 0.326  |
| Em5Me23      | AGCGAGCAAGCCGGTGG //<br>GACTGCGTACGAATTAAC  | 3                        | 100-800                                   | 0.589 | 1.717 | 1.541 | 0.299 | 0.433  |
| Em5Me24      | GAGCGTCGAACCGGATG //<br>GACTGCGTACGAATTAAC  | 3                        | 100-500                                   | 0.592 | 1.303 | 1.246 | 0.133 | 0.189  |
| Em5Me30      | GACCAGTAAACCGGATG //<br>GACTGCGTACGAATTAAC  | 1                        | 200-1200                                  | -     | -     | -     | -     | -      |
| Em10Me9      | TGAGTCCAAACCGGAAT //<br>GACTGCGTACGAATTCAC  | 6                        | 100-500                                   | 0.801 | 1.889 | 1.777 | 0.409 | 0.579  |
| Em10Me25     | CAAATGTGAACCGGATA //<br>GACTGCGTACGAATTCAC  | 3                        | 200-1200                                  | 0.590 | 1.535 | 1.345 | 0.202 | 0.3001 |
| Em10Me31     | CAGGACTAAACCGGATA //<br>GACTGCGTACGAATTCAC  | 2                        | 200-1200                                  | 0.373 | 1.576 | 1.407 | 0.238 | 0.348  |

Table S2. Continued

| SRAP primers | Forward//Reserve primer sequence<br>(5'-3') | Polymorphic<br>fragments | Size range of amplified<br>fragments (bp) | PIC   | NA    | NE    | H     | I     |
|--------------|---------------------------------------------|--------------------------|-------------------------------------------|-------|-------|-------|-------|-------|
| Em13Me24     | GAGCGTCGAACCGGATG //<br>GACTGCGTACGAATTCTA  | 3                        | 100-1200                                  | 0.583 | 1.556 | 1.423 | 0.233 | 0.337 |
| Em13Me30     | GACCAGTAAACCGGATG //<br>GACTGCGTACGAATTCTA  | 4                        | 200-1200                                  | 0.690 | 1.535 | 1.410 | 0.222 | 0.321 |
| Em14Me32     | ATCAGTCGGACCGGATT //<br>GACTGCGTACGAATTCTC  | 2                        | 200-1200                                  | 0.330 | 1.565 | 1.400 | 0.234 | 0.342 |
| Em15Me5      | TGAGTCCAAACCGGGAT //<br>GACTGCGTACGAATTCTT  | 1                        | 200-800                                   | -     | -     | -     | -     | -     |
| Em15Me8      | TGAGTCCAAACCGGTGC //<br>GACTGCGTACGAATTCTT  | 8                        | 200-1200                                  | 0.836 | 2.000 | 1.660 | 0.381 | 0.563 |
| Em15Me23     | AGCGAGCAAGCCGGTGG //<br>GACTGCGTACGAATTCTT  | 3                        | 100-800                                   | 0.584 | 1.353 | 1.279 | 0.152 | 0.218 |
| Em17Me24     | GAGCGTCGAACCGGATG //<br>GACTGCGTACGAATTGTC  | 9                        | 200-500                                   | 0.874 | 1.859 | 1.664 | 0.365 | 0.526 |
| Em19Me12     | TGAGTCCAAACCGGACG //<br>TGTGGTCCGCAAATTTAG  | 8                        | 200-800                                   | 0.805 | 1.879 | 1.434 | 0.156 | 0.211 |
| Total        |                                             | 87                       |                                           |       |       |       |       |       |
| Average      |                                             | 4.35                     |                                           | 0.667 | 1.702 | 1.476 | 0.266 | 0.389 |

PIC, Polymorphic information content; NA, Observed number of alleles; NE, Effective number of alleles; H, Nei's gene diversity; I, Shannon's information index.
