# Supplementary material for: Genetic Diversity in Oilseed and Vegetable Mustard (Brassica juncea L.) Accessions Revealed by Nuclear and Mitochondrial Molecular Markers
Source: MDPI journal article supplement (doi:10.3390/agronomy13030919), 2023-03-20
Supplement: s1 [file s1 › Table S4.pdf]

**Table S4.** Information of seven intron-exon splice junctions (ISJ) primers

| ISJ primers | Primer sequences (5'-3') | Polymorphic bands | PIC   | NA    | NE    | H     | I     |
|-------------|--------------------------|-------------------|-------|-------|-------|-------|-------|
| E4          | GGAATTCCACCTGCA          | 4                 | 0.651 | 1.828 | 1.578 | 0.328 | 0.481 |
| E2          | GGAATTCCACGTCCA          | 8                 | 0.841 | 0.197 | 1.649 | 0.377 | 0.556 |
| R1          | TCGTGGCTGACTTCACTG       | 6                 | 0.786 | 1.979 | 1.714 | 0.404 | 0.588 |
| R2          | TGCTGGTTTGCAGGT          | 9                 | 0.820 | 2.000 | 1.739 | 0.418 | 0.606 |
| R3          | TGCTGTGTGTGGACG          | 5                 | 0.715 | 1.970 | 1.654 | 0.376 | 0.553 |
| R4          | TCGTGGCTGACTTACCTG       | 6                 | 0.761 | 1.838 | 1.554 | 0.320 | 0.473 |
| R5          | TCGTGGCTGACGTCCATT       | 6                 | 0.799 | 1.980 | 1.796 | 0.429 | 0.613 |
| Total       |                          | 44                |       |       |       |       |       |
| Average     |                          | 6.29              | 0.768 | 1.689 | 1.669 | 0.379 | 0.553 |

**PIC**, Polymorphic information content; **NA**, Observed number of alleles; **NE**, Effective number of alleles; **H**, Nei's gene diversity; **I**, Shannon's information index.
