# Supplementary material for: Genetic Diversity in Oilseed and Vegetable Mustard (Brassica juncea L.) Accessions Revealed by Nuclear and Mitochondrial Molecular Markers
Source: MDPI journal article supplement (doi:10.3390/agronomy13030919), 2023-03-20
Supplement: s1 [file s1 › Table S5.pdf]

**Table S5.** PCR primers used in the multiple PCR analysis

| Primer name | Sequence (5'-3')     | Target gene | Size of expected product (bp) | Ref.             |
|-------------|----------------------|-------------|-------------------------------|------------------|
| P11         | GAAACGGGAAGTGACAAT   | Orf138      | 465                           | Zhao et al. [42] |
| P12         | GCATTATTTTCTCGGTCCAT |             |                               |                  |
| P21         | AGCTGTCTGGAGGGAATC   | Orf222      | 1102                          |                  |
| P22         | GCGGTCTCACGCACTAATC  |             |                               |                  |
| P21         | AGCTGTCTGGAGGGAATC   | Orf224      | 747                           |                  |
| P32         | ACGACATCAAGGAGGAAC   |             |                               |                  |
| MSS26-L     | GAGTAGTTTAGCGGCTGCCT | Orf288      | 1401                          | Heng et al. [43] |
| MSS26-R     | TCATACCAAAGCAGAGAAAT |             |                               |                  |
