# Supplementary material for: Genetic Diversity in Oilseed and Vegetable Mustard (Brassica juncea L.) Accessions Revealed by Nuclear and Mitochondrial Molecular Markers
Source: MDPI journal article supplement (doi:10.3390/agronomy13030919), 2023-03-20
Supplement: s1 [file s1 › Table S6.pdf]

**Table S6.** Primers for analyzing mitochondrial genome type

| Primer name | Sequence (5'-3')       | Ref.               |
|-------------|------------------------|--------------------|
| Indel-F     | CGAGATCCAACGGTGAACAGC  | Kang et al. [8]    |
| Indel-R     | GGTAGGGGCTTCATAGCTACTT |                    |
| SNP-F       | TTCTCTACAGCACTCTCGGAC  | Hatono et al. [53] |
| SNP-R       | AAGAGAGAATCGTTGGTTCCT  |                    |
