# Supplementary material for: Genetic Diversity in Oilseed and Vegetable Mustard (Brassica juncea L.) Accessions Revealed by Nuclear and Mitochondrial Molecular Markers
Source: MDPI journal article supplement (doi:10.3390/agronomy13030919), 2023-03-20
Supplement: s1 [file s1 › Table S7.pdf]

**Table S7.** Analysis of molecular variance of *Brassica* accessions in the present study

| Source of variation | df | Sum of squares | Variance components | Percentage of variation |
|---------------------|----|----------------|---------------------|-------------------------|
| Among populations   | 2  | 1053.087       | 16.54010            | 34.07                   |
| Within populations  | 96 | 3073.075       | 32.01119*           | 65.93                   |
| Total               | 98 | 4126.162       | 48.55130            |                         |

\*Fixation index  $F_{st}$  (a value of  $F$  statistic analogs), 0.34067; significance tests (1023 permutations).
