# Supplementary figures and images for: Genetic Diversity in Oilseed and Vegetable Mustard (Brassica juncea L.) Accessions Revealed by Nuclear and Mitochondrial Molecular Markers
Source: MDPI journal article supplement (doi:10.3390/agronomy13030919), 2023-03-20

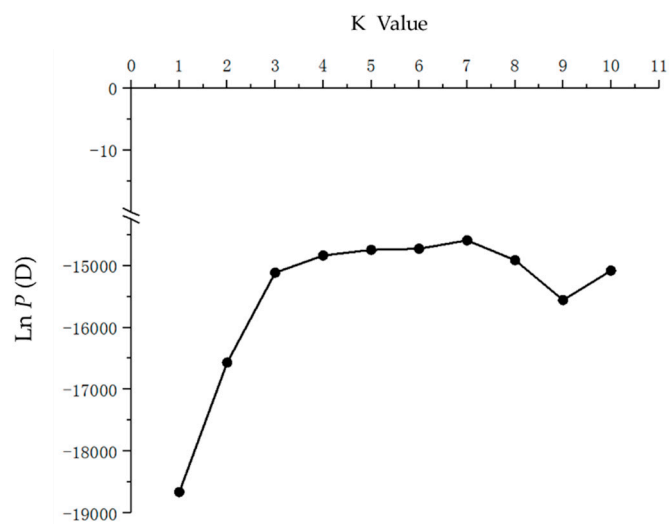

**Figure S4.** Ln probability of data [ $\text{Ln } P(D)$ ] values for different K values.

Supplement: s1 [file s1]
